# Supplementary material for: Homotopy Phases of FQHE with Long-Range Quantum Entanglement in Monolayer and Bilayer Hall Systems
Source: Nanomaterials (Basel). 2020 Jun 30;10(7):1286. doi: 10.3390/nano10071286 (PMC7408279; doi:10.3390/nano10071286)
Supplement: Supplementary file 1 [file nanomaterials-10-01286-s001.zip]

Archive with 27 entries (26 files):
- Definitions/
- Definitions/chicago2.bst
- Definitions/fig-SI-13-eps-converted-to.pdf
- Definitions/fig-SI-13.eps
- Definitions/journalnames.tex
- Definitions/logo-ccby-eps-converted-to.pdf
- Definitions/logo-ccby.eps
- Definitions/logo-mdpi-eps-converted-to.pdf
- Definitions/logo-mdpi.eps
- Definitions/logo-orcid-eps-converted-to.pdf
- Definitions/logo-orcid.eps
- Definitions/logo-updates.pdf
- Definitions/mdpi.bst
- Definitions/mdpi.cls
- Definitions/mdpi.log
- Definitions/mdpi.synctex(busy)
- Definitions/nanomaterials-logo-eps-converted-to.pdf
- Definitions/nanomaterials-logo.eps
- Definitions/wg1000-eps-converted-to.pdf
- Definitions/wg1000.eps
- Definitions/wg600-eps-converted-to.pdf
- Definitions/wg600.eps
- nanomaterials-814391-SM-nobib.aux
- nanomaterials-814391-SM-nobib.log
- nanomaterials-814391-SM-nobib.out
- nanomaterials-814391-SM-nobib.pdf
- nanomaterials-814391-SM-nobib.tex
