# Supplementary material for: Homotopy Phases of FQHE with Long-Range Quantum Entanglement in Monolayer and Bilayer Hall Systems
Source: Nanomaterials (Basel). 2020 Jun 30;10(7):1286. doi: 10.3390/nano10071286 (PMC7408279; doi:10.3390/nano10071286)
Supplement: Supplementary file 1 [file nanomaterials-10-01286-s001.zip › nanomaterials-814391-SM-nobib.aux]

\relax 
\providecommand\hyper@newdestlabel[2]{}
\bibstyle{Definitions/mdpi}
\providecommand\HyperFirstAtBeginDocument{\AtBeginDocument}
\HyperFirstAtBeginDocument{\ifx\hyper@anchor\@undefined
\global\let\oldcontentsline\contentsline
\gdef\contentsline#1#2#3#4{\oldcontentsline{#1}{#2}{#3}}
\global\let\oldnewlabel\newlabel
\gdef\newlabel#1#2{\newlabelxx{#1}#2}
\gdef\newlabelxx#1#2#3#4#5#6{\oldnewlabel{#1}{{#2}{#3}}}
\AtEndDocument{\ifx\hyper@anchor\@undefined
\let\contentsline\oldcontentsline
\let\newlabel\oldnewlabel
\fi}
\fi}
\global\let\hyper@last\relax 
\gdef\HyperFirstAtBeginDocument#1{#1}
\providecommand\HyField@AuxAddToFields[1]{}
\providecommand\HyField@AuxAddToCoFields[2]{}
\citation{landauqm}
\@writefile{toc}{\contentsline {section}{\numberline {A}The Magnetic Field Flux Quantum in Multiply Connected\nobreakspace  {}Space}{1}{section.1}\protected@file@percent }
\newlabel{fluxi}{{A}{1}{The Magnetic Field Flux Quantum in Multiply Connected~Space}{section.1}{}}
\citation{laughlin2}
\citation{jac-ws}
\newlabel{poles}{{7}{2}{The Magnetic Field Flux Quantum in Multiply Connected~Space}{equation.1.7}{}}
\newlabel{flux}{{8}{2}{The Magnetic Field Flux Quantum in Multiply Connected~Space}{equation.1.8}{}}
\newlabel{10}{{A}{2}{The Magnetic Field Flux Quantum in Multiply Connected~Space}{equation.1.8}{}}
\@writefile{toc}{\contentsline {section}{\numberline {B}The Degeneracy of Landau\nobreakspace  {}Levels}{2}{section.2}\protected@file@percent }
\newlabel{degeneracja}{{B}{2}{The Degeneracy of Landau~Levels}{section.2}{}}
\citation{montecarlo}
\citation{egraph}
\newlabel{oscylator}{{11}{3}{The Degeneracy of Landau~Levels}{equation.2.11}{}}
\@writefile{toc}{\contentsline {section}{\numberline {C}Reentrant IQHE in a Single Hall\nobreakspace  {}Layer}{3}{section.3}\protected@file@percent }
\newlabel{reentrant}{{C}{3}{Reentrant IQHE in a Single Hall~Layer}{section.3}{}}
\newlabel{deltae}{{13}{3}{Reentrant IQHE in a Single Hall~Layer}{equation.3.13}{}}
\citation{pan2003}
\citation{pan2003}
\citation{montecarlo}
\@writefile{lof}{\contentsline {figure}{\numberline {S1}{\ignorespaces (\textbf  {Upper}) The pictorial illustration of the shift of electron distribution resulting in reentrant IQHE. (\textbf  {Lower}) Evaluation of $\Delta E$ according to Equation\nobreakspace  {}(\ref  {deltae}) versus $x$, $\nu _{nominal}=\frac  {l-x}{l}$ (for $x=20 l_B$ and $l=100 l_B$, $\nu _{nominal}=0.8$ as is visible in experiment\nobreakspace  {}\cite  {pan2003}). \relax }}{4}{figure.caption.1}\protected@file@percent }
\providecommand*\caption@xref[2]{\@setref\relax\@undefined{#1}}
\newlabel{f4}{{S1}{4}{(\textbf {Upper}) The pictorial illustration of the shift of electron distribution resulting in reentrant IQHE. (\textbf {Lower}) Evaluation of $\Delta E$ according to Equation~(\ref {deltae}) versus $x$, $\nu _{nominal}=\frac {l-x}{l}$ (for $x=20 l_B$ and $l=100 l_B$, $\nu _{nominal}=0.8$ as is visible in experiment~\cite {pan2003}). \relax }{figure.caption.1}{}}
\@writefile{toc}{\contentsline {section}{\numberline {D}Energy Trade-Off in Bilayer Hall System---Contributions to Equation\nobreakspace  {}(11) [Main\nobreakspace  {}Text]}{5}{section.4}\protected@file@percent }
\newlabel{energytradeoff}{{D}{5}{Energy Trade-Off in Bilayer Hall System---Contributions to Equation~(11) [Main~Text]}{section.4}{}}
\newlabel{energy1}{{14}{5}{Energy Trade-Off in Bilayer Hall System---Contributions to Equation~(11) [Main~Text]}{equation.4.14}{}}
\newlabel{energy2}{{15}{5}{Energy Trade-Off in Bilayer Hall System---Contributions to Equation~(11) [Main~Text]}{equation.4.15}{}}
\newlabel{energy3}{{16}{5}{Energy Trade-Off in Bilayer Hall System---Contributions to Equation~(11) [Main~Text]}{equation.4.16}{}}
\newlabel{ggg}{{17}{5}{Energy Trade-Off in Bilayer Hall System---Contributions to Equation~(11) [Main~Text]}{equation.4.17}{}}
\newlabel{ggg1}{{18}{5}{Energy Trade-Off in Bilayer Hall System---Contributions to Equation~(11) [Main~Text]}{equation.4.18}{}}
\citation{montecarlo}
\citation{montecarlo}
\citation{laughlin2}
\citation{montecarlo}
\newlabel{ggg2}{{19}{6}{Energy Trade-Off in Bilayer Hall System---Contributions to Equation~(11) [Main~Text]}{equation.4.19}{}}
\@writefile{lof}{\contentsline {figure}{\numberline {S2}{\ignorespaces The cartoon presentation of the bilayer Hall structure GaAs/GaAlAs/GaAs with marked dimension of an elementary striped sector of length $l$. Electrons are shifted to the over-charged stripes, while empty stripes are hole stripes charged by the positive jellium. The\nobreakspace  {}structure is mirrored symmetrical with charge change across the barrier of thickness $d$, which is possible only for a complementary filling of layers, $\nu _{top}+\nu _{bot}=1$ (r other integer), with\nobreakspace  {}$\nu _{top}=\frac  {(l-x)}{l}$ and $\nu _{bot}=\frac  {x}{l}$ (in left panel, both equal to 1/2). \relax }}{6}{figure.caption.2}\protected@file@percent }
\newlabel{gow111}{{S2}{6}{The cartoon presentation of the bilayer Hall structure GaAs/GaAlAs/GaAs with marked dimension of an elementary striped sector of length $l$. Electrons are shifted to the over-charged stripes, while empty stripes are hole stripes charged by the positive jellium. The~structure is mirrored symmetrical with charge change across the barrier of thickness $d$, which is possible only for a complementary filling of layers, $\nu _{top}+\nu _{bot}=1$ (r other integer), with~$\nu _{top}=\frac {(l-x)}{l}$ and $\nu _{bot}=\frac {x}{l}$ (in left panel, both equal to 1/2). \relax }{figure.caption.2}{}}
\citation{montecarlo}
\@writefile{toc}{\contentsline {section}{\numberline {E}Metropolis Monte Carlo Assessment of the Energy Gain Due to IQHE\nobreakspace  {}Correlations}{7}{section.5}\protected@file@percent }
\newlabel{monte}{{E}{7}{Metropolis Monte Carlo Assessment of the Energy Gain Due to IQHE~Correlations}{section.5}{}}
\@writefile{lof}{\contentsline {figure}{\numberline {S3}{\ignorespaces The components of the interaction energy per single particle for the correlated state of IQHE, $\nu =1$ as listed in Table\nobreakspace  {}\ref  {t1}, versus $\sqrt  {N}$ (by Metropolis Monte Carlo method of averaging over quantum states given by the multiparticle Laughlin-type wave function with $q=1$ for $\nu =1$). \relax }}{7}{figure.caption.3}\protected@file@percent }
\newlabel{f66}{{S3}{7}{The components of the interaction energy per single particle for the correlated state of IQHE, $\nu =1$ as listed in Table~\ref {t1}, versus $\sqrt {N}$ (by Metropolis Monte Carlo method of averaging over quantum states given by the multiparticle Laughlin-type wave function with $q=1$ for $\nu =1$). \relax }{figure.caption.3}{}}
\@writefile{lot}{\contentsline {table}{\numberline {S1}{\ignorespaces Energies of various Coulomb channels for $\nu =1$ IQH state calculated by Metropolis Monte Carlo simulation (in units of $\frac  {e^2}{l_B}\frac  {1}{4\pi \varepsilon _0}$).\relax }}{7}{table.caption.4}\protected@file@percent }
\newlabel{t1}{{S1}{7}{Energies of various Coulomb channels for $\nu =1$ IQH state calculated by Metropolis Monte Carlo simulation (in units of $\frac {e^2}{l_B}\frac {1}{4\pi \varepsilon _0}$).\relax }{table.caption.4}{}}
\citation{montecarlo}
\citation{dz,bogolub}
\citation{dz}
\citation{dz,ueda,zlz,macd,fertig1989}
\citation{fertig1989,macd,zlz,ueda,dz}
\@writefile{toc}{\contentsline {section}{\numberline {F}Two-Component Bogolubov Model for Superfluid Exciton BEC in Bilayer Hall\nobreakspace  {}Systems}{8}{section.6}\protected@file@percent }
\newlabel{twocomponent}{{F}{8}{Two-Component Bogolubov Model for Superfluid Exciton BEC in Bilayer Hall~Systems}{section.6}{}}
\newlabel{ham1}{{21}{8}{Two-Component Bogolubov Model for Superfluid Exciton BEC in Bilayer Hall~Systems}{equation.6.21}{}}
\citation{bogolub}
\citation{zlz,ueda,dz,fertig1989}
\citation{dz,zlz,ueda,macd,fertig1989}
\citation{dz,ueda,zlz,fertig1989,macd}
\citation{fertig1989,macd}
\citation{fertig1989,macd}
\bibcite{landauqm}{{1}{1965}{{Landau and Liifsitz}}{{}}}
\bibcite{laughlin2}{{2}{1983}{{Laughlin}}{{}}}
\bibcite{jac-ws}{{3}{2012}{{Jacak \em  {et~al.}}}{{Jacak, Gonczarek, Jacak, and J{\'o}{\'z}wiak}}}
\bibcite{montecarlo}{{4}{2003}{{Ciftja and Wexler}}{{}}}
\bibcite{dz}{{5}{1968}{{Gorkov and Dzyaloshinskii}}{{}}}
\bibcite{bogolub}{{6}{1947}{{Bogolubov}}{{}}}
\bibcite{ueda}{{7}{1985}{{Paquet \em  {et~al.}}}{{Paquet, Rice, and Ueda}}}
\bibcite{zlz}{{8}{1984}{{Kallin and Halperin}}{{}}}
\bibcite{macd}{{9}{2001}{{MacDonald}}{{}}}
\bibcite{fertig1989}{{10}{1989}{{Fertig}}{{}}}
\bibcite{egraph}{{11}{2013}{{Santos and Kaxiras}}{{}}}
\bibcite{pan2003}{{12}{2003}{{Pan \em  {et~al.}}}{{Pan, St{\"o}rmer, Tsui, Pfeiffer, Baldwin, and West}}}
\@writefile{toc}{\contentsline {section}{References}{10}{equation.6.23}\protected@file@percent }
\newlabel{LastPage}{{}{10}{}{page.10}{}}
\xdef\lastpage@lastpage{10}
\xdef\lastpage@lastpageHy{10}
\expandafter\ifx\csname c@page@totc\endcsname\relax\newcounter{page@totc}\fi\setcounter{page@totc}{11}
