# Supplementary material for: Homotopy Phases of FQHE with Long-Range Quantum Entanglement in Monolayer and Bilayer Hall Systems
Source: Nanomaterials (Basel). 2020 Jun 30;10(7):1286. doi: 10.3390/nano10071286 (PMC7408279; doi:10.3390/nano10071286)
Supplement: Supplementary file 1 [file nanomaterials-10-01286-s001.zip › nanomaterials-814391-SM-nobib.log]

This is pdfTeX, Version 3.14159265-2.6-1.40.20 (MiKTeX 2.9.7200 64-bit) (preloaded format=pdflatex 2019.11.12)  29 JUN 2020 17:14
entering extended mode
**./nanomaterials-814391-SM-nobib.tex
(nanomaterials-814391-SM-nobib.tex
LaTeX2e <2019-10-01> patch level 1
(Definitions/mdpi.cls
Document Class: Definitions/mdpi 10/10/2020 MDPI paper class
("C:\Users\kl-qE\AppData\Local\Programs\MiKTeX 2.9\tex/latex/base\article.cls"
Document Class: article 2019/08/27 v1.4j Standard LaTeX document class
("C:\Users\kl-qE\AppData\Local\Programs\MiKTeX 2.9\tex/latex/base\size10.clo"
File: size10.clo 2019/08/27 v1.4j Standard LaTeX file (size option)
)
\c@part=\count80
\c@section=\count81
\c@subsection=\count82
\c@subsubsection=\count83
\c@paragraph=\count84
\c@subparagraph=\count85
\c@figure=\count86
\c@table=\count87
\abovecaptionskip=\skip41
\belowcaptionskip=\skip42
\bibindent=\dimen102
) ("C:\Users\kl-qE\AppData\Local\Programs\MiKTeX 2.9\tex/latex/base\fontenc.sty
"
Package: fontenc 2018/08/11 v2.0j Standard LaTeX package
("C:\Users\kl-qE\AppData\Local\Programs\MiKTeX 2.9\tex/latex/base\t1enc.def"
File: t1enc.def 2018/08/11 v2.0j Standard LaTeX file
LaTeX Font Info:    Redeclaring font encoding T1 on input line 48.
))
("C:\Users\kl-qE\AppData\Local\Programs\MiKTeX 2.9\tex/latex/base\inputenc.sty"
Package: inputenc 2018/08/11 v1.3c Input encoding file
\inpenc@prehook=\toks14
\inpenc@posthook=\toks15
) ("C:\Users\kl-qE\AppData\Local\Programs\MiKTeX 2.9\tex/latex/tools\calc.sty"
Package: calc 2017/05/25 v4.3 Infix arithmetic (KKT,FJ)
\calc@Acount=\count88
\calc@Bcount=\count89
\calc@Adimen=\dimen103
\calc@Bdimen=\dimen104
\calc@Askip=\skip43
\calc@Bskip=\skip44
LaTeX Info: Redefining \setlength on input line 80.
LaTeX Info: Redefining \addtolength on input line 81.
\calc@Ccount=\count90
\calc@Cskip=\skip45
)
("C:\Users\kl-qE\AppData\Local\Programs\MiKTeX 2.9\tex/latex/tools\indentfirst.
sty"
Package: indentfirst 1995/11/23 v1.03 Indent first paragraph (DPC)
)
("C:\Users\kl-qE\AppData\Local\Programs\MiKTeX 2.9\tex/latex/fancyhdr\fancyhdr.
sty"
Package: fancyhdr 2019/01/31 v3.10 Extensive control of page headers and footer
s
\f@nch@headwidth=\skip46
\f@nch@O@elh=\skip47
\f@nch@O@erh=\skip48
\f@nch@O@olh=\skip49
\f@nch@O@orh=\skip50
\f@nch@O@elf=\skip51
\f@nch@O@erf=\skip52
\f@nch@O@olf=\skip53
\f@nch@O@orf=\skip54
)
("C:\Users\kl-qE\AppData\Local\Programs\MiKTeX 2.9\tex/latex/graphics\graphicx.
sty"
Package: graphicx 2017/06/01 v1.1a Enhanced LaTeX Graphics (DPC,SPQR)

("C:\Users\kl-qE\AppData\Local\Programs\MiKTeX 2.9\tex/latex/graphics\keyval.st
y"
Package: keyval 2014/10/28 v1.15 key=value parser (DPC)
\KV@toks@=\toks16
)
("C:\Users\kl-qE\AppData\Local\Programs\MiKTeX 2.9\tex/latex/graphics\graphics.
sty"
Package: graphics 2019/10/08 v1.3c Standard LaTeX Graphics (DPC,SPQR)

("C:\Users\kl-qE\AppData\Local\Programs\MiKTeX 2.9\tex/latex/graphics\trig.sty"
Package: trig 2016/01/03 v1.10 sin cos tan (DPC)
)
("C:\Users\kl-qE\AppData\Local\Programs\MiKTeX 2.9\tex/latex/graphics-cfg\graph
ics.cfg"
File: graphics.cfg 2016/06/04 v1.11 sample graphics configuration
)
Package graphics Info: Driver file: pdftex.def on input line 105.

("C:\Users\kl-qE\AppData\Local\Programs\MiKTeX 2.9\tex/latex/graphics-def\pdfte
x.def"
File: pdftex.def 2018/01/08 v1.0l Graphics/color driver for pdftex
))
\Gin@req@height=\dimen105
\Gin@req@width=\dimen106
)
("C:\Users\kl-qE\AppData\Local\Programs\MiKTeX 2.9\tex/latex/oberdiek\epstopdf.
sty"
Package: epstopdf 2016/05/15 v2.6 Conversion with epstopdf on the fly (HO)

("C:\Users\kl-qE\AppData\Local\Programs\MiKTeX 2.9\tex/latex/oberdiek\epstopdf-
base.sty"
Package: epstopdf-base 2016/05/15 v2.6 Base part for package epstopdf

("C:\Users\kl-qE\AppData\Local\Programs\MiKTeX 2.9\tex/generic/oberdiek\infware
rr.sty"
Package: infwarerr 2016/05/16 v1.4 Providing info/warning/error messages (HO)
)
("C:\Users\kl-qE\AppData\Local\Programs\MiKTeX 2.9\tex/latex/oberdiek\grfext.st
y"
Package: grfext 2016/05/16 v1.2 Manage graphics extensions (HO)

("C:\Users\kl-qE\AppData\Local\Programs\MiKTeX 2.9\tex/generic/oberdiek\kvdefin
ekeys.sty"
Package: kvdefinekeys 2016/05/16 v1.4 Define keys (HO)

("C:\Users\kl-qE\AppData\Local\Programs\MiKTeX 2.9\tex/generic/oberdiek\ltxcmds
.sty"
Package: ltxcmds 2016/05/16 v1.23 LaTeX kernel commands for general use (HO)
)))
("C:\Users\kl-qE\AppData\Local\Programs\MiKTeX 2.9\tex/latex/oberdiek\kvoptions
.sty"
Package: kvoptions 2016/05/16 v3.12 Key value format for package options (HO)

("C:\Users\kl-qE\AppData\Local\Programs\MiKTeX 2.9\tex/generic/oberdiek\kvsetke
ys.sty"
Package: kvsetkeys 2016/05/16 v1.17 Key value parser (HO)

("C:\Users\kl-qE\AppData\Local\Programs\MiKTeX 2.9\tex/generic/oberdiek\etexcmd
s.sty"
Package: etexcmds 2016/05/16 v1.6 Avoid name clashes with e-TeX commands (HO)

("C:\Users\kl-qE\AppData\Local\Programs\MiKTeX 2.9\tex/generic/oberdiek\ifluate
x.sty"
Package: ifluatex 2016/05/16 v1.4 Provides the ifluatex switch (HO)
Package ifluatex Info: LuaTeX not detected.
))))
("C:\Users\kl-qE\AppData\Local\Programs\MiKTeX 2.9\tex/generic/oberdiek\pdftexc
mds.sty"
Package: pdftexcmds 2019/07/25 v0.30 Utility functions of pdfTeX for LuaTeX (HO
)

("C:\Users\kl-qE\AppData\Local\Programs\MiKTeX 2.9\tex/generic/oberdiek\ifpdf.s
ty"
Package: ifpdf 2018/09/07 v3.3 Provides the ifpdf switch
)
Package pdftexcmds Info: LuaTeX not detected.
Package pdftexcmds Info: \pdf@primitive is available.
Package pdftexcmds Info: \pdf@ifprimitive is available.
Package pdftexcmds Info: \pdfdraftmode found.
)
Package epstopdf-base Info: Redefining graphics rule for `.eps' on input line 4
38.
Package grfext Info: Graphics extension search list:
(grfext)             [.pdf,.png,.jpg,.mps,.jpeg,.jbig2,.jb2,.PDF,.PNG,.JPG,.JPE
G,.JBIG2,.JB2,.eps]
(grfext)             \AppendGraphicsExtensions on input line 456.
))
("C:\Users\kl-qE\AppData\Local\Programs\MiKTeX 2.9\tex/latex/lastpage\lastpage.
sty"
Package: lastpage 2015/03/29 v1.2m Refers to last page's name (HMM; JPG)
)
("C:\Users\kl-qE\AppData\Local\Programs\MiKTeX 2.9\tex/latex/base\ifthen.sty"
Package: ifthen 2014/09/29 v1.1c Standard LaTeX ifthen package (DPC)
)
("C:\Users\kl-qE\AppData\Local\Programs\MiKTeX 2.9\tex/latex/lineno\lineno.sty"
Package: lineno 2005/11/02 line numbers on paragraphs v4.41
\linenopenalty=\count91
\output=\toks17
\linenoprevgraf=\count92
\linenumbersep=\dimen107
\linenumberwidth=\dimen108
\c@linenumber=\count93
\c@pagewiselinenumber=\count94
\c@LN@truepage=\count95
\c@internallinenumber=\count96
\c@internallinenumbers=\count97
\quotelinenumbersep=\dimen109
\bframerule=\dimen110
\bframesep=\dimen111
\bframebox=\box27
LaTeX Info: Redefining \\ on input line 3056.
) ("C:\Users\kl-qE\AppData\Local\Programs\MiKTeX 2.9\tex/latex/float\float.sty"
Package: float 2001/11/08 v1.3d Float enhancements (AL)
\c@float@type=\count98
\float@exts=\toks18
\float@box=\box28
\@float@everytoks=\toks19
\@floatcapt=\box29
)
("C:\Users\kl-qE\AppData\Local\Programs\MiKTeX 2.9\tex/latex/amsmath\amsmath.st
y"
Package: amsmath 2019/04/01 v2.17c AMS math features
\@mathmargin=\skip55

For additional information on amsmath, use the `?' option.

("C:\Users\kl-qE\AppData\Local\Programs\MiKTeX 2.9\tex/latex/amsmath\amstext.st
y"
Package: amstext 2000/06/29 v2.01 AMS text

("C:\Users\kl-qE\AppData\Local\Programs\MiKTeX 2.9\tex/latex/amsmath\amsgen.sty
"
File: amsgen.sty 1999/11/30 v2.0 generic functions
\@emptytoks=\toks20
\ex@=\dimen112
))
("C:\Users\kl-qE\AppData\Local\Programs\MiKTeX 2.9\tex/latex/amsmath\amsbsy.sty
"
Package: amsbsy 1999/11/29 v1.2d Bold Symbols
\pmbraise@=\dimen113
)
("C:\Users\kl-qE\AppData\Local\Programs\MiKTeX 2.9\tex/latex/amsmath\amsopn.sty
"
Package: amsopn 2016/03/08 v2.02 operator names
)
\inf@bad=\count99
LaTeX Info: Redefining \frac on input line 227.
\uproot@=\count100
\leftroot@=\count101
LaTeX Info: Redefining \overline on input line 389.
\classnum@=\count102
\DOTSCASE@=\count103
LaTeX Info: Redefining \ldots on input line 486.
LaTeX Info: Redefining \dots on input line 489.
LaTeX Info: Redefining \cdots on input line 610.
\Mathstrutbox@=\box30
\strutbox@=\box31
\big@size=\dimen114
LaTeX Font Info:    Redeclaring font encoding OML on input line 733.
LaTeX Font Info:    Redeclaring font encoding OMS on input line 734.
\macc@depth=\count104
\c@MaxMatrixCols=\count105
\dotsspace@=\muskip10
\c@parentequation=\count106
\dspbrk@lvl=\count107
\tag@help=\toks21
\row@=\count108
\column@=\count109
\maxfields@=\count110
\andhelp@=\toks22
\eqnshift@=\dimen115
\alignsep@=\dimen116
\tagshift@=\dimen117
\tagwidth@=\dimen118
\totwidth@=\dimen119
\lineht@=\dimen120
\@envbody=\toks23
\multlinegap=\skip56
\multlinetaggap=\skip57
\mathdisplay@stack=\toks24
LaTeX Info: Redefining \[ on input line 2855.
LaTeX Info: Redefining \] on input line 2856.
)
("C:\Users\kl-qE\AppData\Local\Programs\MiKTeX 2.9\tex/latex/setspace\setspace.
sty"
Package: setspace 2011/12/19 v6.7a set line spacing
)
("C:\Users\kl-qE\AppData\Local\Programs\MiKTeX 2.9\tex/latex/enumitem\enumitem.
sty"
Package: enumitem 2019/06/20 v3.9 Customized lists
\labelindent=\skip58
\enit@outerparindent=\dimen121
\enit@toks=\toks25
\enit@inbox=\box32
\enit@count@id=\count111
\enitdp@description=\count112
)
("C:\Users\kl-qE\AppData\Local\Programs\MiKTeX 2.9\tex/latex/psnfss\mathpazo.st
y"
Package: mathpazo 2005/04/12 PSNFSS-v9.2a Palatino w/ Pazo Math (D.Puga, WaS) 
\symupright=\mathgroup4
)
("C:\Users\kl-qE\AppData\Local\Programs\MiKTeX 2.9\tex/latex/booktabs\booktabs.
sty"
Package: booktabs 2019/10/08 v1.6180339 publication quality tables
\heavyrulewidth=\dimen122
\lightrulewidth=\dimen123
\cmidrulewidth=\dimen124
\belowrulesep=\dimen125
\belowbottomsep=\dimen126
\aboverulesep=\dimen127
\abovetopsep=\dimen128
\cmidrulesep=\dimen129
\cmidrulekern=\dimen130
\defaultaddspace=\dimen131
\@cmidla=\count113
\@cmidlb=\count114
\@aboverulesep=\dimen132
\@belowrulesep=\dimen133
\@thisruleclass=\count115
\@lastruleclass=\count116
\@thisrulewidth=\dimen134
)
("C:\Users\kl-qE\AppData\Local\Programs\MiKTeX 2.9\tex/latex/titlesec\titlesec.
sty"
Package: titlesec 2019/09/09 v2.12 Sectioning titles
\ttl@box=\box33
\beforetitleunit=\skip59
\aftertitleunit=\skip60
\ttl@plus=\dimen135
\ttl@minus=\dimen136
\ttl@toksa=\toks26
\titlewidth=\dimen137
\titlewidthlast=\dimen138
\titlewidthfirst=\dimen139
)
("C:\Users\kl-qE\AppData\Local\Programs\MiKTeX 2.9\tex/latex/etoolbox\etoolbox.
sty"
Package: etoolbox 2019/09/21 v2.5h e-TeX tools for LaTeX (JAW)
\etb@tempcnta=\count117
)
("C:\Users\kl-qE\AppData\Local\Programs\MiKTeX 2.9\tex/latex/tabto-ltx\tabto.st
y"
Package: tabto 2018/12/28  v 1.4  Another tabbing mechanism
\CurrentLineWidth=\dimen140
\TabPrevPos=\dimen141
)
("C:\Users\kl-qE\AppData\Local\Programs\MiKTeX 2.9\tex/latex/xcolor\xcolor.sty"
Package: xcolor 2016/05/11 v2.12 LaTeX color extensions (UK)

("C:\Users\kl-qE\AppData\Local\Programs\MiKTeX 2.9\tex/latex/graphics-cfg\color
.cfg"
File: color.cfg 2016/01/02 v1.6 sample color configuration
)
Package xcolor Info: Driver file: pdftex.def on input line 225.

("C:\Users\kl-qE\AppData\Local\Programs\MiKTeX 2.9\tex/latex/colortbl\colortbl.
sty"
Package: colortbl 2018/12/12 v1.0d Color table columns (DPC)

("C:\Users\kl-qE\AppData\Local\Programs\MiKTeX 2.9\tex/latex/tools\array.sty"
Package: array 2019/08/31 v2.4l Tabular extension package (FMi)
\col@sep=\dimen142
\ar@mcellbox=\box34
\extrarowheight=\dimen143
\NC@list=\toks27
\extratabsurround=\skip61
\backup@length=\skip62
\ar@cellbox=\box35
)
\everycr=\toks28
\minrowclearance=\skip63
)
\rownum=\count118
Package xcolor Info: Model `cmy' substituted by `cmy0' on input line 1348.
Package xcolor Info: Model `hsb' substituted by `rgb' on input line 1352.
Package xcolor Info: Model `RGB' extended on input line 1364.
Package xcolor Info: Model `HTML' substituted by `rgb' on input line 1366.
Package xcolor Info: Model `Hsb' substituted by `hsb' on input line 1367.
Package xcolor Info: Model `tHsb' substituted by `hsb' on input line 1368.
Package xcolor Info: Model `HSB' substituted by `hsb' on input line 1369.
Package xcolor Info: Model `Gray' substituted by `gray' on input line 1370.
Package xcolor Info: Model `wave' substituted by `hsb' on input line 1371.
) ("C:\Users\kl-qE\AppData\Local\Programs\MiKTeX 2.9\tex/latex/soul\soul.sty"
Package: soul 2003/11/17 v2.4 letterspacing/underlining (mf)
\SOUL@word=\toks29
\SOUL@lasttoken=\toks30
\SOUL@cmds=\toks31
\SOUL@buffer=\toks32
\SOUL@token=\toks33
\SOUL@spaceskip=\skip64
\SOUL@ttwidth=\dimen144
\SOUL@uldp=\dimen145
\SOUL@ulht=\dimen146
)
("C:\Users\kl-qE\AppData\Local\Programs\MiKTeX 2.9\tex/latex/multirow\multirow.
sty"
Package: multirow 2019/05/31 v2.5 Span multiple rows of a table
\multirow@colwidth=\skip65
\multirow@cntb=\count119
\multirow@dima=\skip66
\bigstrutjot=\dimen147
)
("C:\Users\kl-qE\AppData\Local\Programs\MiKTeX 2.9\tex/latex/microtype\microtyp
e.sty"
Package: microtype 2019/10/10 v2.7c Micro-typographical refinements (RS)
\MT@toks=\toks34
\MT@count=\count120
LaTeX Info: Redefining \textls on input line 790.
\MT@outer@kern=\dimen148
LaTeX Info: Redefining \textmicrotypecontext on input line 1347.
\MT@listname@count=\count121

("C:\Users\kl-qE\AppData\Local\Programs\MiKTeX 2.9\tex/latex/microtype\microtyp
e-pdftex.def"
File: microtype-pdftex.def 2019/10/10 v2.7c Definitions specific to pdftex (RS)

LaTeX Info: Redefining \lsstyle on input line 914.
LaTeX Info: Redefining \lslig on input line 914.
\MT@outer@space=\skip67
)
Package microtype Info: Loading configuration file microtype.cfg.

("C:\Users\kl-qE\AppData\Local\Programs\MiKTeX 2.9\tex/latex/microtype\microtyp
e.cfg"
File: microtype.cfg 2019/10/10 v2.7c microtype main configuration file (RS)
))
("C:\Users\kl-qE\AppData\Local\Programs\MiKTeX 2.9\tex/latex/pgf/frontendlayer\
tikz.sty"
("C:\Users\kl-qE\AppData\Local\Programs\MiKTeX 2.9\tex/latex/pgf/basiclayer\pgf
.sty"
("C:\Users\kl-qE\AppData\Local\Programs\MiKTeX 2.9\tex/latex/pgf/utilities\pgfr
cs.sty"
("C:\Users\kl-qE\AppData\Local\Programs\MiKTeX 2.9\tex/generic/pgf/utilities\pg
futil-common.tex"
\pgfutil@everybye=\toks35
\pgfutil@tempdima=\dimen149
\pgfutil@tempdimb=\dimen150

("C:\Users\kl-qE\AppData\Local\Programs\MiKTeX 2.9\tex/generic/pgf/utilities\pg
futil-common-lists.tex"))
("C:\Users\kl-qE\AppData\Local\Programs\MiKTeX 2.9\tex/generic/pgf/utilities\pg
futil-latex.def"
\pgfutil@abb=\box36

("C:\Users\kl-qE\AppData\Local\Programs\MiKTeX 2.9\tex/latex/ms\everyshi.sty"
Package: everyshi 2001/05/15 v3.00 EveryShipout Package (MS)
))
("C:\Users\kl-qE\AppData\Local\Programs\MiKTeX 2.9\tex/generic/pgf/utilities\pg
frcs.code.tex"
("C:\Users\kl-qE\AppData\Local\Programs\MiKTeX 2.9\tex/generic/pgf\pgf.revision
.tex")
Package: pgfrcs 2019/08/03 v3.1.4b (3.1.4b)
))
Package: pgf 2019/08/03 v3.1.4b (3.1.4b)

("C:\Users\kl-qE\AppData\Local\Programs\MiKTeX 2.9\tex/latex/pgf/basiclayer\pgf
core.sty"
("C:\Users\kl-qE\AppData\Local\Programs\MiKTeX 2.9\tex/latex/pgf/systemlayer\pg
fsys.sty"
("C:\Users\kl-qE\AppData\Local\Programs\MiKTeX 2.9\tex/generic/pgf/systemlayer\
pgfsys.code.tex"
Package: pgfsys 2019/08/03 v3.1.4b (3.1.4b)

("C:\Users\kl-qE\AppData\Local\Programs\MiKTeX 2.9\tex/generic/pgf/utilities\pg
fkeys.code.tex"
\pgfkeys@pathtoks=\toks36
\pgfkeys@temptoks=\toks37

("C:\Users\kl-qE\AppData\Local\Programs\MiKTeX 2.9\tex/generic/pgf/utilities\pg
fkeysfiltered.code.tex"
\pgfkeys@tmptoks=\toks38
))
\pgf@x=\dimen151
\pgf@y=\dimen152
\pgf@xa=\dimen153
\pgf@ya=\dimen154
\pgf@xb=\dimen155
\pgf@yb=\dimen156
\pgf@xc=\dimen157
\pgf@yc=\dimen158
\pgf@xd=\dimen159
\pgf@yd=\dimen160
\w@pgf@writea=\write3
\r@pgf@reada=\read1
\c@pgf@counta=\count122
\c@pgf@countb=\count123
\c@pgf@countc=\count124
\c@pgf@countd=\count125
\t@pgf@toka=\toks39
\t@pgf@tokb=\toks40
\t@pgf@tokc=\toks41
\pgf@sys@id@count=\count126

("C:\Users\kl-qE\AppData\Local\Programs\MiKTeX 2.9\tex/generic/pgf/systemlayer\
pgf.cfg"
File: pgf.cfg 2019/08/03 v3.1.4b (3.1.4b)
)
Driver file for pgf: pgfsys-pdftex.def

("C:\Users\kl-qE\AppData\Local\Programs\MiKTeX 2.9\tex/generic/pgf/systemlayer\
pgfsys-pdftex.def"
File: pgfsys-pdftex.def 2019/08/03 v3.1.4b (3.1.4b)

("C:\Users\kl-qE\AppData\Local\Programs\MiKTeX 2.9\tex/generic/pgf/systemlayer\
pgfsys-common-pdf.def"
File: pgfsys-common-pdf.def 2019/08/03 v3.1.4b (3.1.4b)
)))
("C:\Users\kl-qE\AppData\Local\Programs\MiKTeX 2.9\tex/generic/pgf/systemlayer\
pgfsyssoftpath.code.tex"
File: pgfsyssoftpath.code.tex 2019/08/03 v3.1.4b (3.1.4b)
\pgfsyssoftpath@smallbuffer@items=\count127
\pgfsyssoftpath@bigbuffer@items=\count128
)
("C:\Users\kl-qE\AppData\Local\Programs\MiKTeX 2.9\tex/generic/pgf/systemlayer\
pgfsysprotocol.code.tex"
File: pgfsysprotocol.code.tex 2019/08/03 v3.1.4b (3.1.4b)
))
("C:\Users\kl-qE\AppData\Local\Programs\MiKTeX 2.9\tex/generic/pgf/basiclayer\p
gfcore.code.tex"
Package: pgfcore 2019/08/03 v3.1.4b (3.1.4b)

("C:\Users\kl-qE\AppData\Local\Programs\MiKTeX 2.9\tex/generic/pgf/math\pgfmath
.code.tex"
("C:\Users\kl-qE\AppData\Local\Programs\MiKTeX 2.9\tex/generic/pgf/math\pgfmath
calc.code.tex"
("C:\Users\kl-qE\AppData\Local\Programs\MiKTeX 2.9\tex/generic/pgf/math\pgfmath
util.code.tex")
("C:\Users\kl-qE\AppData\Local\Programs\MiKTeX 2.9\tex/generic/pgf/math\pgfmath
parser.code.tex"
\pgfmath@dimen=\dimen161
\pgfmath@count=\count129
\pgfmath@box=\box37
\pgfmath@toks=\toks42
\pgfmath@stack@operand=\toks43
\pgfmath@stack@operation=\toks44
)
("C:\Users\kl-qE\AppData\Local\Programs\MiKTeX 2.9\tex/generic/pgf/math\pgfmath
functions.code.tex"
("C:\Users\kl-qE\AppData\Local\Programs\MiKTeX 2.9\tex/generic/pgf/math\pgfmath
functions.basic.code.tex")
("C:\Users\kl-qE\AppData\Local\Programs\MiKTeX 2.9\tex/generic/pgf/math\pgfmath
functions.trigonometric.code.tex")
("C:\Users\kl-qE\AppData\Local\Programs\MiKTeX 2.9\tex/generic/pgf/math\pgfmath
functions.random.code.tex")
("C:\Users\kl-qE\AppData\Local\Programs\MiKTeX 2.9\tex/generic/pgf/math\pgfmath
functions.comparison.code.tex")
("C:\Users\kl-qE\AppData\Local\Programs\MiKTeX 2.9\tex/generic/pgf/math\pgfmath
functions.base.code.tex")
("C:\Users\kl-qE\AppData\Local\Programs\MiKTeX 2.9\tex/generic/pgf/math\pgfmath
functions.round.code.tex")
("C:\Users\kl-qE\AppData\Local\Programs\MiKTeX 2.9\tex/generic/pgf/math\pgfmath
functions.misc.code.tex")
("C:\Users\kl-qE\AppData\Local\Programs\MiKTeX 2.9\tex/generic/pgf/math\pgfmath
functions.integerarithmetics.code.tex")))
("C:\Users\kl-qE\AppData\Local\Programs\MiKTeX 2.9\tex/generic/pgf/math\pgfmath
float.code.tex"
\c@pgfmathroundto@lastzeros=\count130
))
("C:\Users\kl-qE\AppData\Local\Programs\MiKTeX 2.9\tex/generic/pgf/math\pgfint.
code.tex")
("C:\Users\kl-qE\AppData\Local\Programs\MiKTeX 2.9\tex/generic/pgf/basiclayer\p
gfcorepoints.code.tex"
File: pgfcorepoints.code.tex 2019/08/03 v3.1.4b (3.1.4b)
\pgf@picminx=\dimen162
\pgf@picmaxx=\dimen163
\pgf@picminy=\dimen164
\pgf@picmaxy=\dimen165
\pgf@pathminx=\dimen166
\pgf@pathmaxx=\dimen167
\pgf@pathminy=\dimen168
\pgf@pathmaxy=\dimen169
\pgf@xx=\dimen170
\pgf@xy=\dimen171
\pgf@yx=\dimen172
\pgf@yy=\dimen173
\pgf@zx=\dimen174
\pgf@zy=\dimen175
)
("C:\Users\kl-qE\AppData\Local\Programs\MiKTeX 2.9\tex/generic/pgf/basiclayer\p
gfcorepathconstruct.code.tex"
File: pgfcorepathconstruct.code.tex 2019/08/03 v3.1.4b (3.1.4b)
\pgf@path@lastx=\dimen176
\pgf@path@lasty=\dimen177
)
("C:\Users\kl-qE\AppData\Local\Programs\MiKTeX 2.9\tex/generic/pgf/basiclayer\p
gfcorepathusage.code.tex"
File: pgfcorepathusage.code.tex 2019/08/03 v3.1.4b (3.1.4b)
\pgf@shorten@end@additional=\dimen178
\pgf@shorten@start@additional=\dimen179
)
("C:\Users\kl-qE\AppData\Local\Programs\MiKTeX 2.9\tex/generic/pgf/basiclayer\p
gfcorescopes.code.tex"
File: pgfcorescopes.code.tex 2019/08/03 v3.1.4b (3.1.4b)
\pgfpic=\box38
\pgf@hbox=\box39
\pgf@layerbox@main=\box40
\pgf@picture@serial@count=\count131
)
("C:\Users\kl-qE\AppData\Local\Programs\MiKTeX 2.9\tex/generic/pgf/basiclayer\p
gfcoregraphicstate.code.tex"
File: pgfcoregraphicstate.code.tex 2019/08/03 v3.1.4b (3.1.4b)
\pgflinewidth=\dimen180
)
("C:\Users\kl-qE\AppData\Local\Programs\MiKTeX 2.9\tex/generic/pgf/basiclayer\p
gfcoretransformations.code.tex"
File: pgfcoretransformations.code.tex 2019/08/03 v3.1.4b (3.1.4b)
\pgf@pt@x=\dimen181
\pgf@pt@y=\dimen182
\pgf@pt@temp=\dimen183
)
("C:\Users\kl-qE\AppData\Local\Programs\MiKTeX 2.9\tex/generic/pgf/basiclayer\p
gfcorequick.code.tex"
File: pgfcorequick.code.tex 2019/08/03 v3.1.4b (3.1.4b)
)
("C:\Users\kl-qE\AppData\Local\Programs\MiKTeX 2.9\tex/generic/pgf/basiclayer\p
gfcoreobjects.code.tex"
File: pgfcoreobjects.code.tex 2019/08/03 v3.1.4b (3.1.4b)
)
("C:\Users\kl-qE\AppData\Local\Programs\MiKTeX 2.9\tex/generic/pgf/basiclayer\p
gfcorepathprocessing.code.tex"
File: pgfcorepathprocessing.code.tex 2019/08/03 v3.1.4b (3.1.4b)
)
("C:\Users\kl-qE\AppData\Local\Programs\MiKTeX 2.9\tex/generic/pgf/basiclayer\p
gfcorearrows.code.tex"
File: pgfcorearrows.code.tex 2019/08/03 v3.1.4b (3.1.4b)
\pgfarrowsep=\dimen184
)
("C:\Users\kl-qE\AppData\Local\Programs\MiKTeX 2.9\tex/generic/pgf/basiclayer\p
gfcoreshade.code.tex"
File: pgfcoreshade.code.tex 2019/08/03 v3.1.4b (3.1.4b)
\pgf@max=\dimen185
\pgf@sys@shading@range@num=\count132
\pgf@shadingcount=\count133
)
("C:\Users\kl-qE\AppData\Local\Programs\MiKTeX 2.9\tex/generic/pgf/basiclayer\p
gfcoreimage.code.tex"
File: pgfcoreimage.code.tex 2019/08/03 v3.1.4b (3.1.4b)

("C:\Users\kl-qE\AppData\Local\Programs\MiKTeX 2.9\tex/generic/pgf/basiclayer\p
gfcoreexternal.code.tex"
File: pgfcoreexternal.code.tex 2019/08/03 v3.1.4b (3.1.4b)
\pgfexternal@startupbox=\box41
))
("C:\Users\kl-qE\AppData\Local\Programs\MiKTeX 2.9\tex/generic/pgf/basiclayer\p
gfcorelayers.code.tex"
File: pgfcorelayers.code.tex 2019/08/03 v3.1.4b (3.1.4b)
)
("C:\Users\kl-qE\AppData\Local\Programs\MiKTeX 2.9\tex/generic/pgf/basiclayer\p
gfcoretransparency.code.tex"
File: pgfcoretransparency.code.tex 2019/08/03 v3.1.4b (3.1.4b)
)
("C:\Users\kl-qE\AppData\Local\Programs\MiKTeX 2.9\tex/generic/pgf/basiclayer\p
gfcorepatterns.code.tex"
File: pgfcorepatterns.code.tex 2019/08/03 v3.1.4b (3.1.4b)
)
("C:\Users\kl-qE\AppData\Local\Programs\MiKTeX 2.9\tex/generic/pgf/basiclayer\p
gfcorerdf.code.tex"
File: pgfcorerdf.code.tex 2019/08/03 v3.1.4b (3.1.4b)
)))
("C:\Users\kl-qE\AppData\Local\Programs\MiKTeX 2.9\tex/generic/pgf/modules\pgfm
oduleshapes.code.tex"
File: pgfmoduleshapes.code.tex 2019/08/03 v3.1.4b (3.1.4b)
\pgfnodeparttextbox=\box42
)
("C:\Users\kl-qE\AppData\Local\Programs\MiKTeX 2.9\tex/generic/pgf/modules\pgfm
oduleplot.code.tex"
File: pgfmoduleplot.code.tex 2019/08/03 v3.1.4b (3.1.4b)
)
("C:\Users\kl-qE\AppData\Local\Programs\MiKTeX 2.9\tex/latex/pgf/compatibility\
pgfcomp-version-0-65.sty"
Package: pgfcomp-version-0-65 2019/08/03 v3.1.4b (3.1.4b)
\pgf@nodesepstart=\dimen186
\pgf@nodesepend=\dimen187
)
("C:\Users\kl-qE\AppData\Local\Programs\MiKTeX 2.9\tex/latex/pgf/compatibility\
pgfcomp-version-1-18.sty"
Package: pgfcomp-version-1-18 2019/08/03 v3.1.4b (3.1.4b)
))
("C:\Users\kl-qE\AppData\Local\Programs\MiKTeX 2.9\tex/latex/pgf/utilities\pgff
or.sty"
("C:\Users\kl-qE\AppData\Local\Programs\MiKTeX 2.9\tex/latex/pgf/utilities\pgfk
eys.sty"
("C:\Users\kl-qE\AppData\Local\Programs\MiKTeX 2.9\tex/generic/pgf/utilities\pg
fkeys.code.tex"))
("C:\Users\kl-qE\AppData\Local\Programs\MiKTeX 2.9\tex/latex/pgf/math\pgfmath.s
ty"
("C:\Users\kl-qE\AppData\Local\Programs\MiKTeX 2.9\tex/generic/pgf/math\pgfmath
.code.tex"))
("C:\Users\kl-qE\AppData\Local\Programs\MiKTeX 2.9\tex/generic/pgf/utilities\pg
ffor.code.tex"
Package: pgffor 2019/08/03 v3.1.4b (3.1.4b)

("C:\Users\kl-qE\AppData\Local\Programs\MiKTeX 2.9\tex/generic/pgf/math\pgfmath
.code.tex")
\pgffor@iter=\dimen188
\pgffor@skip=\dimen189
\pgffor@stack=\toks45
\pgffor@toks=\toks46
))
("C:\Users\kl-qE\AppData\Local\Programs\MiKTeX 2.9\tex/generic/pgf/frontendlaye
r/tikz\tikz.code.tex"
Package: tikz 2019/08/03 v3.1.4b (3.1.4b)

("C:\Users\kl-qE\AppData\Local\Programs\MiKTeX 2.9\tex/generic/pgf/libraries\pg
flibraryplothandlers.code.tex"
File: pgflibraryplothandlers.code.tex 2019/08/03 v3.1.4b (3.1.4b)
\pgf@plot@mark@count=\count134
\pgfplotmarksize=\dimen190
)
\tikz@lastx=\dimen191
\tikz@lasty=\dimen192
\tikz@lastxsaved=\dimen193
\tikz@lastysaved=\dimen194
\tikz@lastmovetox=\dimen195
\tikz@lastmovetoy=\dimen196
\tikzleveldistance=\dimen197
\tikzsiblingdistance=\dimen198
\tikz@figbox=\box43
\tikz@figbox@bg=\box44
\tikz@tempbox=\box45
\tikz@tempbox@bg=\box46
\tikztreelevel=\count135
\tikznumberofchildren=\count136
\tikznumberofcurrentchild=\count137
\tikz@fig@count=\count138

("C:\Users\kl-qE\AppData\Local\Programs\MiKTeX 2.9\tex/generic/pgf/modules\pgfm
odulematrix.code.tex"
File: pgfmodulematrix.code.tex 2019/08/03 v3.1.4b (3.1.4b)
\pgfmatrixcurrentrow=\count139
\pgfmatrixcurrentcolumn=\count140
\pgf@matrix@numberofcolumns=\count141
)
\tikz@expandcount=\count142

("C:\Users\kl-qE\AppData\Local\Programs\MiKTeX 2.9\tex/generic/pgf/frontendlaye
r/tikz/libraries\tikzlibrarytopaths.code.tex"
File: tikzlibrarytopaths.code.tex 2019/08/03 v3.1.4b (3.1.4b)
)))
("C:\Users\kl-qE\AppData\Local\Programs\MiKTeX 2.9\tex/latex/totcount\totcount.
sty"
Package: totcount 2011/01/25 v1.2 package for gettingthe total value of LaTeX c
ounters
) (Definitions/journalnames.tex)
("C:\Users\kl-qE\AppData\Local\Programs\MiKTeX 2.9\tex/latex/amscls\amsthm.sty"
Package: amsthm 2017/10/31 v2.20.4
\thm@style=\toks47
\thm@bodyfont=\toks48
\thm@headfont=\toks49
\thm@notefont=\toks50
\thm@headpunct=\toks51
\thm@preskip=\skip68
\thm@postskip=\skip69
\thm@headsep=\skip70
\dth@everypar=\toks52
)
\c@theorem=\count143
\c@lemma=\count144
\c@corollary=\count145
\c@proposition=\count146
\c@characterization=\count147
\c@property=\count148
\c@problem=\count149
\c@example=\count150
\c@examplesanddefinitions=\count151
\c@remark=\count152
\c@definition=\count153
\c@hypothesis=\count154
\c@notation=\count155
\c@assumption=\count156

("C:\Users\kl-qE\AppData\Local\Programs\MiKTeX 2.9\tex/latex/hyphenat\hyphenat.
sty"
Package: hyphenat 2009/09/02 v2.3c hyphenation utilities
\langwohyphens=\language82
LaTeX Info: Redefining \_ on input line 43.
)
("C:\Users\kl-qE\AppData\Local\Programs\MiKTeX 2.9\tex/latex/natbib\natbib.sty"
Package: natbib 2010/09/13 8.31b (PWD, AO)
\bibhang=\skip71
\bibsep=\skip72
LaTeX Info: Redefining \cite on input line 694.
\c@NAT@ctr=\count157
)
("C:\Users\kl-qE\AppData\Local\Programs\MiKTeX 2.9\tex/latex/hyperref\hyperref.
sty"
Package: hyperref 2019/09/28 v7.00a Hypertext links for LaTeX

("C:\Users\kl-qE\AppData\Local\Programs\MiKTeX 2.9\tex/generic/oberdiek\hobsub-
hyperref.sty"
Package: hobsub-hyperref 2016/05/16 v1.14 Bundle oberdiek, subset hyperref (HO)


("C:\Users\kl-qE\AppData\Local\Programs\MiKTeX 2.9\tex/generic/oberdiek\hobsub-
generic.sty"
Package: hobsub-generic 2016/05/16 v1.14 Bundle oberdiek, subset generic (HO)
Package: hobsub 2016/05/16 v1.14 Construct package bundles (HO)
Package hobsub Info: Skipping package `infwarerr' (already loaded).
Package hobsub Info: Skipping package `ltxcmds' (already loaded).
Package hobsub Info: Skipping package `ifluatex' (already loaded).
Package: ifvtex 2016/05/16 v1.6 Detect VTeX and its facilities (HO)
Package ifvtex Info: VTeX not detected.
Package: intcalc 2016/05/16 v1.2 Expandable calculations with integers (HO)
Package hobsub Info: Skipping package `ifpdf' (already loaded).
Package hobsub Info: Skipping package `etexcmds' (already loaded).
Package hobsub Info: Skipping package `kvsetkeys' (already loaded).
Package hobsub Info: Skipping package `kvdefinekeys' (already loaded).
Package hobsub Info: Skipping package `pdftexcmds' (already loaded).
Package: pdfescape 2016/05/16 v1.14 Implements pdfTeX's escape features (HO)
Package: bigintcalc 2016/05/16 v1.4 Expandable calculations on big integers (HO
)
Package: bitset 2016/05/16 v1.2 Handle bit-vector datatype (HO)
Package: uniquecounter 2016/05/16 v1.3 Provide unlimited unique counter (HO)
)
Package hobsub Info: Skipping package `hobsub' (already loaded).
Package: letltxmacro 2016/05/16 v1.5 Let assignment for LaTeX macros (HO)
Package: hopatch 2016/05/16 v1.3 Wrapper for package hooks (HO)
Package: xcolor-patch 2016/05/16 xcolor patch
Package: atveryend 2016/05/16 v1.9 Hooks at the very end of document (HO)
Package: atbegshi 2016/06/09 v1.18 At begin shipout hook (HO)
Package: refcount 2016/05/16 v3.5 Data extraction from label references (HO)
Package: hycolor 2016/05/16 v1.8 Color options for hyperref/bookmark (HO)
)
("C:\Users\kl-qE\AppData\Local\Programs\MiKTeX 2.9\tex/generic/ifxetex\ifxetex.
sty"
Package: ifxetex 2010/09/12 v0.6 Provides ifxetex conditional
)
("C:\Users\kl-qE\AppData\Local\Programs\MiKTeX 2.9\tex/latex/oberdiek\auxhook.s
ty"
Package: auxhook 2016/05/16 v1.4 Hooks for auxiliary files (HO)
)
\@linkdim=\dimen199
\Hy@linkcounter=\count158
\Hy@pagecounter=\count159

("C:\Users\kl-qE\AppData\Local\Programs\MiKTeX 2.9\tex/latex/hyperref\pd1enc.de
f"
File: pd1enc.def 2019/09/28 v7.00a Hyperref: PDFDocEncoding definition (HO)
Now handling font encoding PD1 ...
... no UTF-8 mapping file for font encoding PD1
)
\Hy@SavedSpaceFactor=\count160

("C:\Users\kl-qE\AppData\Local\Programs\MiKTeX 2.9\tex/latex/00miktex\hyperref.
cfg"
File: hyperref.cfg 2002/06/06 v1.2 hyperref configuration of TeXLive
)
Package hyperref Info: Option `unicode' set `true' on input line 4414.

("C:\Users\kl-qE\AppData\Local\Programs\MiKTeX 2.9\tex/latex/hyperref\puenc.def
"
File: puenc.def 2019/09/28 v7.00a Hyperref: PDF Unicode definition (HO)
Now handling font encoding PU ...
... no UTF-8 mapping file for font encoding PU
)
Package hyperref Info: Option `bookmarksopen' set `true' on input line 4414.
Package hyperref Info: Option `pdffitwindow' set `true' on input line 4414.
Package hyperref Info: Option `colorlinks' set `true' on input line 4414.
Package hyperref Info: Option `hyperfootnotes' set `false' on input line 4414.
Package hyperref Info: Hyper figures OFF on input line 4540.
Package hyperref Info: Link nesting OFF on input line 4545.
Package hyperref Info: Hyper index ON on input line 4548.
Package hyperref Info: Plain pages OFF on input line 4555.
Package hyperref Info: Backreferencing OFF on input line 4560.
Package hyperref Info: Implicit mode ON; LaTeX internals redefined.
Package hyperref Info: Bookmarks ON on input line 4793.
\c@Hy@tempcnt=\count161
 ("C:\Users\kl-qE\AppData\Local\Programs\MiKTeX 2.9\tex/latex/url\url.sty"
\Urlmuskip=\muskip11
Package: url 2013/09/16  ver 3.4  Verb mode for urls, etc.
)
LaTeX Info: Redefining \url on input line 5152.
\XeTeXLinkMargin=\dimen256
\Fld@menulength=\count162
\Field@Width=\dimen257
\Fld@charsize=\dimen258
Package hyperref Info: Hyper figures OFF on input line 6423.
Package hyperref Info: Link nesting OFF on input line 6428.
Package hyperref Info: Hyper index ON on input line 6431.
Package hyperref Info: backreferencing OFF on input line 6438.
Package hyperref Info: Link coloring ON on input line 6441.
Package hyperref Info: Link coloring with OCG OFF on input line 6448.
Package hyperref Info: PDF/A mode OFF on input line 6453.
LaTeX Info: Redefining \ref on input line 6493.
LaTeX Info: Redefining \pageref on input line 6497.
\Hy@abspage=\count163
\c@Item=\count164
)
Package hyperref Info: Driver: hpdftex.

("C:\Users\kl-qE\AppData\Local\Programs\MiKTeX 2.9\tex/latex/hyperref\hpdftex.d
ef"
File: hpdftex.def 2019/09/28 v7.00a Hyperref driver for pdfTeX
\Fld@listcount=\count165
\c@bookmark@seq@number=\count166

("C:\Users\kl-qE\AppData\Local\Programs\MiKTeX 2.9\tex/latex/oberdiek\rerunfile
check.sty"
Package: rerunfilecheck 2016/05/16 v1.8 Rerun checks for auxiliary files (HO)
Package uniquecounter Info: New unique counter `rerunfilecheck' on input line 2
82.
)
\Hy@SectionHShift=\skip73
)
("C:\Users\kl-qE\AppData\Local\Programs\MiKTeX 2.9\tex/latex/footmisc\footmisc.
sty"
Package: footmisc 2011/06/06 v5.5b a miscellany of footnote facilities
\FN@temptoken=\toks53
\footnotemargin=\dimen259
\c@pp@next@reset=\count167
Package footmisc Info: Declaring symbol style bringhurst on input line 855.
Package footmisc Info: Declaring symbol style chicago on input line 863.
Package footmisc Info: Declaring symbol style wiley on input line 872.
Package footmisc Info: Declaring symbol style lamport-robust on input line 883.

Package footmisc Info: Declaring symbol style lamport* on input line 903.
Package footmisc Info: Declaring symbol style lamport*-robust on input line 924
.
)
\c@page@totc=\count168

("C:\Users\kl-qE\AppData\Local\Programs\MiKTeX 2.9\tex/latex/geometry\geometry.
sty"
Package: geometry 2018/04/16 v5.8 Page Geometry
\Gm@cnth=\count169
\Gm@cntv=\count170
\c@Gm@tempcnt=\count171
\Gm@bindingoffset=\dimen260
\Gm@wd@mp=\dimen261
\Gm@odd@mp=\dimen262
\Gm@even@mp=\dimen263
\Gm@layoutwidth=\dimen264
\Gm@layoutheight=\dimen265
\Gm@layouthoffset=\dimen266
\Gm@layoutvoffset=\dimen267
\Gm@dimlist=\toks54

("C:\Users\kl-qE\AppData\Local\Programs\MiKTeX 2.9\tex/latex/geometry\geometry.
cfg"))
("C:\Users\kl-qE\AppData\Local\Programs\MiKTeX 2.9\tex/latex/caption\newfloat.s
ty"
Package: newfloat 2019/09/01 v1.1k Defining new floating environments (AR)
Package newfloat Info: `float' package detected.
)
Package newfloat Info: New float `listing' with options `' on input line 987.
\c@listing=\count172
Package newfloat Info: float type `listing'=4 on input line 987.
Package newfloat Info: New float `boxenv' with options `name=Box' on input line
 988.
\c@boxenv=\count173
Package newfloat Info: float type `boxenv'=8 on input line 988.
Package newfloat Info: New float `chart' with options `' on input line 989.
\c@chart=\count174
Package newfloat Info: float type `chart'=16 on input line 989.
Package newfloat Info: New float `scheme' with options `' on input line 990.
\c@scheme=\count175
Package newfloat Info: float type `scheme'=32 on input line 990.

("C:\Users\kl-qE\AppData\Local\Programs\MiKTeX 2.9\tex/latex/caption\caption.st
y"
Package: caption 2019/09/01 v3.3d Customizing captions (AR)

("C:\Users\kl-qE\AppData\Local\Programs\MiKTeX 2.9\tex/latex/caption\caption3.s
ty"
Package: caption3 2019/09/01 v1.8d caption3 kernel (AR)
Package caption3 Info: TeX engine: e-TeX on input line 64.
\captionmargin=\dimen268
\captionmargin@=\dimen269
\captionwidth=\dimen270
\caption@tempdima=\dimen271
\caption@indent=\dimen272
\caption@parindent=\dimen273
\caption@hangindent=\dimen274
)
\c@caption@flags=\count176
\c@ContinuedFloat=\count177
Package caption Info: float package is loaded.
Package caption Info: hyperref package is loaded.
)
\@justcentbox=\box47
\wideitemsep=\skip74
) (nanomaterials-814391-SM-nobib.aux)
\openout1 = `nanomaterials-814391-SM-nobib.aux'.

LaTeX Font Info:    Checking defaults for OML/cmm/m/it on input line 153.
LaTeX Font Info:    ... okay on input line 153.
LaTeX Font Info:    Checking defaults for T1/cmr/m/n on input line 153.
LaTeX Font Info:    ... okay on input line 153.
LaTeX Font Info:    Checking defaults for OT1/cmr/m/n on input line 153.
LaTeX Font Info:    ... okay on input line 153.
LaTeX Font Info:    Checking defaults for OMS/cmsy/m/n on input line 153.
LaTeX Font Info:    ... okay on input line 153.
LaTeX Font Info:    Checking defaults for OMX/cmex/m/n on input line 153.
LaTeX Font Info:    ... okay on input line 153.
LaTeX Font Info:    Checking defaults for U/cmr/m/n on input line 153.
LaTeX Font Info:    ... okay on input line 153.
LaTeX Font Info:    Checking defaults for PD1/pdf/m/n on input line 153.
LaTeX Font Info:    ... okay on input line 153.
LaTeX Font Info:    Checking defaults for PU/pdf/m/n on input line 153.
LaTeX Font Info:    ... okay on input line 153.
LaTeX Font Info:    Trying to load font information for T1+ppl on input line 15
3.

("C:\Users\kl-qE\AppData\Local\Programs\MiKTeX 2.9\tex/latex/psnfss\t1ppl.fd"
File: t1ppl.fd 2001/06/04 font definitions for T1/ppl.
)
("C:\Users\kl-qE\AppData\Local\Programs\MiKTeX 2.9\tex/context/base/mkii\supp-p
df.mkii"
[Loading MPS to PDF converter (version 2006.09.02).]
\scratchcounter=\count178
\scratchdimen=\dimen275
\scratchbox=\box48
\nofMPsegments=\count179
\nofMParguments=\count180
\everyMPshowfont=\toks55
\MPscratchCnt=\count181
\MPscratchDim=\dimen276
\MPnumerator=\count182
\makeMPintoPDFobject=\count183
\everyMPtoPDFconversion=\toks56
)
Package lastpage Info: Please have a look at the pageslts package at
(lastpage)             https://www.ctan.org/pkg/pageslts
(lastpage)             ! on input line 153.
LaTeX Info: Redefining \microtypecontext on input line 153.
Package microtype Info: Generating PDF output.
Package microtype Info: Character protrusion enabled (level 2).
Package microtype Info: Using default protrusion set `alltext'.
Package microtype Info: Automatic font expansion enabled (level 2),
(microtype)             stretch: 20, shrink: 20, step: 1, non-selected.
Package microtype Info: Using default expansion set `basictext'.
LaTeX Info: Redefining \showhyphens on input line 153.
Package microtype Info: No adjustment of tracking.
Package microtype Info: No adjustment of interword spacing.
Package microtype Info: No adjustment of character kerning.

("C:\Users\kl-qE\AppData\Local\Programs\MiKTeX 2.9\tex/latex/microtype\mt-ppl.c
fg"
File: mt-ppl.cfg 2005/11/16 v1.6 microtype config. file: Palatino (RS)
) ABD: EveryShipout initializing macros
\AtBeginShipoutBox=\box49
Package hyperref Info: Link coloring ON on input line 153.

("C:\Users\kl-qE\AppData\Local\Programs\MiKTeX 2.9\tex/latex/hyperref\nameref.s
ty"
Package: nameref 2019/09/16 v2.46 Cross-referencing by name of section

("C:\Users\kl-qE\AppData\Local\Programs\MiKTeX 2.9\tex/generic/oberdiek\gettitl
estring.sty"
Package: gettitlestring 2016/05/16 v1.5 Cleanup title references (HO)
)
\c@section@level=\count184
)
LaTeX Info: Redefining \ref on input line 153.
LaTeX Info: Redefining \pageref on input line 153.
LaTeX Info: Redefining \nameref on input line 153.
 (nanomaterials-814391-SM-nobib.out)
(nanomaterials-814391-SM-nobib.out)
\@outlinefile=\write4
\openout4 = `nanomaterials-814391-SM-nobib.out'.

\symAMSb=\mathgroup5

*geometry* detected driver: pdftex
*geometry* verbose mode - [ preamble ] result:
* driver: pdftex
* paper: a4paper
* layout: <same size as paper>
* layoutoffset:(h,v)=(0.0pt,0.0pt)
* modes: includehead includefoot 
* h-part:(L,W,R)=(76.82234pt, 443.86319pt, 76.82234pt)
* v-part:(T,H,B)=(51.21504pt, 751.15268pt, 42.67912pt)
* \paperwidth=597.50787pt
* \paperheight=845.04684pt
* \textwidth=443.86319pt
* \textheight=684.15268pt
* \oddsidemargin=4.55235pt
* \evensidemargin=4.55235pt
* \topmargin=-21.05495pt
* \headheight=12.0pt
* \headsep=25.0pt
* \topskip=10.0pt
* \footskip=30.0pt
* \marginparwidth=57.0pt
* \marginparsep=11.0pt
* \columnsep=10.0pt
* \skip\footins=34.14322pt
* \hoffset=0.0pt
* \voffset=0.0pt
* \mag=1000
* \@twocolumnfalse
* \@twosidefalse
* \@mparswitchfalse
* \@reversemarginfalse
* (1in=72.27pt=25.4mm, 1cm=28.453pt)

Package caption Info: Begin \AtBeginDocument code.
Package caption Info: End \AtBeginDocument code.
LaTeX Font Info:    Font shape `T1/ppl/bx/n' in size <18> not available
(Font)              Font shape `T1/ppl/b/n' tried instead on input line 153.
LaTeX Font Info:    Font shape `T1/ppl/bx/n' in size <10> not available
(Font)              Font shape `T1/ppl/b/n' tried instead on input line 153.
Package epstopdf Info: Source file: <Definitions/logo-orcid.eps>
(epstopdf)                    date: 2018-07-22 00:33:52
(epstopdf)                    size: 284378 bytes
(epstopdf)             Output file: <Definitions/logo-orcid-eps-converted-to.pd
f>
(epstopdf)                    date: 2020-06-28 11:07:10
(epstopdf)                    size: 12409 bytes
(epstopdf)             Command: <epstopdf --outfile=Definitions/logo-orcid-eps-
converted-to.pdf Definitions/logo-orcid.eps>
(epstopdf)             \includegraphics on input line 153.
Package epstopdf Info: Output file is already uptodate.


pdfTeX warning: pdflatex.exe (file ./Definitions/logo-orcid-eps-converted-to.pd
f): PDF inclusion: found PDF version <1.7>, but at most version <1.5> allowed
<Definitions/logo-orcid-eps-converted-to.pdf, id=35, 102.3825pt x 102.3825pt>
File: Definitions/logo-orcid-eps-converted-to.pdf Graphic file (type pdf)
<use Definitions/logo-orcid-eps-converted-to.pdf>
Package pdftex.def Info: Definitions/logo-orcid-eps-converted-to.pdf  used on i
nput line 153.
(pdftex.def)             Requested size: 9.10509pt x 9.10466pt.
LaTeX Font Info:    Trying to load font information for OT1+ppl on input line 1
53.
("C:\Users\kl-qE\AppData\Local\Programs\MiKTeX 2.9\tex/latex/psnfss\ot1ppl.fd"
File: ot1ppl.fd 2001/06/04 font definitions for OT1/ppl.
)
LaTeX Font Info:    Trying to load font information for OML+zplm on input line 
153.
("C:\Users\kl-qE\AppData\Local\Programs\MiKTeX 2.9\tex/latex/psnfss\omlzplm.fd"
File: omlzplm.fd 2002/09/08 Fontinst v1.914 font definitions for OML/zplm.
)
LaTeX Font Info:    Trying to load font information for OMS+zplm on input line 
153.
 ("C:\Users\kl-qE\AppData\Local\Programs\MiKTeX 2.9\tex/latex/psnfss\omszplm.fd
"
File: omszplm.fd 2002/09/08 Fontinst v1.914 font definitions for OMS/zplm.
)
LaTeX Font Info:    Trying to load font information for OMX+zplm on input line 
153.

("C:\Users\kl-qE\AppData\Local\Programs\MiKTeX 2.9\tex/latex/psnfss\omxzplm.fd"
File: omxzplm.fd 2002/09/08 Fontinst v1.914 font definitions for OMX/zplm.
)
LaTeX Font Info:    Trying to load font information for OT1+zplm on input line 
153.
 ("C:\Users\kl-qE\AppData\Local\Programs\MiKTeX 2.9\tex/latex/psnfss\ot1zplm.fd
"
File: ot1zplm.fd 2002/09/08 Fontinst v1.914 font definitions for OT1/zplm.
)
Package microtype Info: Loading generic protrusion settings for font family
(microtype)             `zplm' (encoding: OT1).
(microtype)             For optimal results, create family-specific settings.
(microtype)             See the microtype manual for details.
LaTeX Font Info:    Font shape `U/msb/m/n' will be
(Font)              scaled to size 10.42007pt on input line 153.

("C:\Users\kl-qE\AppData\Local\Programs\MiKTeX 2.9\tex/latex/microtype\mt-msb.c
fg"
File: mt-msb.cfg 2005/06/01 v1.0 microtype config. file: AMS symbols (b) (RS)
)
LaTeX Font Info:    Font shape `U/msb/m/n' will be
(Font)              scaled to size 7.91925pt on input line 153.
LaTeX Font Info:    Font shape `U/msb/m/n' will be
(Font)              scaled to size 6.25204pt on input line 153.
LaTeX Font Info:    Font shape `T1/ppl/bx/n' in size <8> not available
(Font)              Font shape `T1/ppl/b/n' tried instead on input line 192.
 [1{C:/Users/kl-qE/AppData/Local/MiKTeX/2.9/pdftex/config/pdftex.map}

 <./Definitions/logo-orcid-eps-converted-to.pdf>] [2] [3]
Package epstopdf Info: Source file: <Definitions/wg1000.eps>
(epstopdf)                    date: 2020-05-04 18:08:54
(epstopdf)                    size: 1115293 bytes
(epstopdf)             Output file: <Definitions/wg1000-eps-converted-to.pdf>
(epstopdf)                    date: 2020-06-26 10:04:56
(epstopdf)                    size: 34386 bytes
(epstopdf)             Command: <epstopdf --outfile=Definitions/wg1000-eps-conv
erted-to.pdf Definitions/wg1000.eps>
(epstopdf)             \includegraphics on input line 265.
Package epstopdf Info: Output file is already uptodate.
<Definitions/wg1000-eps-converted-to.pdf, id=93, 1213.53375pt x 775.89874pt>
File: Definitions/wg1000-eps-converted-to.pdf Graphic file (type pdf)
<use Definitions/wg1000-eps-converted-to.pdf>
Package pdftex.def Info: Definitions/wg1000-eps-converted-to.pdf  used on input
 line 265.
(pdftex.def)             Requested size: 1213.5308pt x 775.89685pt.
LaTeX Font Info:    Font shape `T1/ppl/bx/n' in size <9> not available
(Font)              Font shape `T1/ppl/b/n' tried instead on input line 266.
LaTeX Font Info:    Font shape `U/msb/m/n' will be
(Font)              scaled to size 9.37807pt on input line 266.
LaTeX Font Info:    Font shape `U/msb/m/n' will be
(Font)              scaled to size 7.29405pt on input line 266.
LaTeX Font Info:    Font shape `U/msb/m/n' will be
(Font)              scaled to size 5.21004pt on input line 266.

Underfull \hbox (badness 3568) in paragraph at lines 281--288
\T1/ppl/m/n/10 (+20) can be also as-sessed by the Metropo-lis Monte Carlo ap-pr
oach for quan-tum av-er-ag-ing,
 []


Underfull \hbox (badness 2351) in paragraph at lines 281--288
\T1/ppl/m/n/10 (+20) us-ing the an-a-lyt-i-cal form of the in-te-gral, $\OML/zp
lm/m/it/10  [][] d[]r[] \OT1/zplm/m/n/10 = [][]\OML/zplm/m/it/10 f []$\T1/ppl/
m/n/10 (+20) , with $\OML/zplm/m/it/10 f\OT1/zplm/m/n/10 (\OML/zplm/m/it/10 x\O
T1/zplm/m/n/10 ) =
 []

[4 <./Definitions/wg1000-eps-converted-to.pdf>] [5]
Package epstopdf Info: Source file: <Definitions/wg600.eps>
(epstopdf)                    date: 2020-05-04 18:08:54
(epstopdf)                    size: 3659977 bytes
(epstopdf)             Output file: <Definitions/wg600-eps-converted-to.pdf>
(epstopdf)                    date: 2020-06-26 10:04:54
(epstopdf)                    size: 290344 bytes
(epstopdf)             Command: <epstopdf --outfile=Definitions/wg600-eps-conve
rted-to.pdf Definitions/wg600.eps>
(epstopdf)             \includegraphics on input line 376.
Package epstopdf Info: Output file is already uptodate.
<Definitions/wg600-eps-converted-to.pdf, id=128, 1469.49pt x 568.1225pt>
File: Definitions/wg600-eps-converted-to.pdf Graphic file (type pdf)
<use Definitions/wg600-eps-converted-to.pdf>
Package pdftex.def Info: Definitions/wg600-eps-converted-to.pdf  used on input 
line 376.
(pdftex.def)             Requested size: 1469.48642pt x 568.1211pt.
 [6 <./Definitions/wg600-eps-converted-to.pdf>]
Package epstopdf Info: Source file: <Definitions/fig-SI-13.eps>
(epstopdf)                    date: 2020-05-04 18:08:54
(epstopdf)                    size: 1260058 bytes
(epstopdf)             Output file: <Definitions/fig-SI-13-eps-converted-to.pdf
>
(epstopdf)                    date: 2020-06-26 10:04:58
(epstopdf)                    size: 22565 bytes
(epstopdf)             Command: <epstopdf --outfile=Definitions/fig-SI-13-eps-c
onverted-to.pdf Definitions/fig-SI-13.eps>
(epstopdf)             \includegraphics on input line 395.
Package epstopdf Info: Output file is already uptodate.
<Definitions/fig-SI-13-eps-converted-to.pdf, id=150, 205.76875pt x 109.40875pt>

File: Definitions/fig-SI-13-eps-converted-to.pdf Graphic file (type pdf)
<use Definitions/fig-SI-13-eps-converted-to.pdf>
Package pdftex.def Info: Definitions/fig-SI-13-eps-converted-to.pdf  used on in
put line 395.
(pdftex.def)             Requested size: 205.76823pt x 109.40846pt.
 [7 <./Definitions/fig-SI-13-eps-converted-to.pdf>] [8]
[9] 
AED: lastpage setting LastPage
[10]
Package atveryend Info: Empty hook `BeforeClearDocument' on input line 594.
Package atveryend Info: Empty hook `AfterLastShipout' on input line 594.
 (nanomaterials-814391-SM-nobib.aux)
Package atveryend Info: Executing hook `AtVeryEndDocument' on input line 594.
Package atveryend Info: Executing hook `AtEndAfterFileList' on input line 594.
Package rerunfilecheck Info: File `nanomaterials-814391-SM-nobib.out' has not c
hanged.
(rerunfilecheck)             Checksum: 042E7424FE3D45DC6492B255F139A883;2334.
 )
(\end occurred inside a group at level 1)

### simple group (level 1) entered at line 259 ({)
### bottom level 
Here is how much of TeX's memory you used:
 26243 strings out of 492453
 457027 string characters out of 3120075
 565775 words of memory out of 3000000
 29763 multiletter control sequences out of 15000+200000
 77035 words of font info for 324 fonts, out of 3000000 for 9000
 1141 hyphenation exceptions out of 8191
 68i,14n,58p,2777b,529s stack positions out of 5000i,500n,10000p,200000b,50000s
{C:/Users/kl-qE/AppData/Local/Programs/MiKTeX 2.9/fonts/enc/dvi
ps/base/8r.enc}<C:/Users/kl-qE/AppData/Local/Programs/MiKTeX 2.9/fonts/type1/pu
blic/amsfonts/cm/cmbsy10.pfb><C:/Users/kl-qE/AppData/Local/Programs/MiKTeX 2.9/
fonts/type1/public/amsfonts/cm/cmex10.pfb><C:/Users/kl-qE/AppData/Local/Program
s/MiKTeX 2.9/fonts/type1/public/amsfonts/cm/cmmi10.pfb><C:/Users/kl-qE/AppData/
Local/Programs/MiKTeX 2.9/fonts/type1/public/amsfonts/cm/cmr10.pfb><C:/Users/kl
-qE/AppData/Local/Programs/MiKTeX 2.9/fonts/type1/public/amsfonts/cm/cmsy10.pfb
><C:/Users/kl-qE/AppData/Local/Programs/MiKTeX 2.9/fonts/type1/public/mathpazo/
fplmb.pfb><C:/Users/kl-qE/AppData/Local/Programs/MiKTeX 2.9/fonts/type1/public/
mathpazo/fplmr.pfb><C:/Users/kl-qE/AppData/Local/Programs/MiKTeX 2.9/fonts/type
1/public/mathpazo/fplmri.pfb><C:/Users/kl-qE/AppData/Local/Programs/MiKTeX 2.9/
fonts/type1/urw/palatino/uplb8a.pfb><C:/Users/kl-qE/AppData/Local/Programs/MiKT
eX 2.9/fonts/type1/urw/palatino/uplbi8a.pfb><C:/Users/kl-qE/AppData/Local/Progr
ams/MiKTeX 2.9/fonts/type1/urw/palatino/uplr8a.pfb><C:/Users/kl-qE/AppData/Loca
l/Programs/MiKTeX 2.9/fonts/type1/urw/palatino/uplri8a.pfb>
Output written on nanomaterials-814391-SM-nobib.pdf (10 pages, 571060 bytes).
PDF statistics:
 287 PDF objects out of 1000 (max. 8388607)
 56 named destinations out of 1000 (max. 500000)
 43097 words of extra memory for PDF output out of 51595 (max. 10000000)
