# Supplementary material for: Homotopy Phases of FQHE with Long-Range Quantum Entanglement in Monolayer and Bilayer Hall Systems
Source: Nanomaterials (Basel). 2020 Jun 30;10(7):1286. doi: 10.3390/nano10071286 (PMC7408279; doi:10.3390/nano10071286)
Supplement: Supplementary file 1 [file nanomaterials-10-01286-s001.zip › nanomaterials-814391-SM-nobib.out]

\BOOKMARK [1][]{section.1}{\376\377\000T\000h\000e\000\040\000M\000a\000g\000n\000e\000t\000i\000c\000\040\000F\000i\000e\000l\000d\000\040\000F\000l\000u\000x\000\040\000Q\000u\000a\000n\000t\000u\000m\000\040\000i\000n\000\040\000M\000u\000l\000t\000i\000p\000l\000y\000\040\000C\000o\000n\000n\000e\000c\000t\000e\000d\000\040\000S\000p\000a\000c\000e}{}% 1
\BOOKMARK [1][]{section.2}{\376\377\000T\000h\000e\000\040\000D\000e\000g\000e\000n\000e\000r\000a\000c\000y\000\040\000o\000f\000\040\000L\000a\000n\000d\000a\000u\000\040\000L\000e\000v\000e\000l\000s}{}% 2
\BOOKMARK [1][]{section.3}{\376\377\000R\000e\000e\000n\000t\000r\000a\000n\000t\000\040\000I\000Q\000H\000E\000\040\000i\000n\000\040\000a\000\040\000S\000i\000n\000g\000l\000e\000\040\000H\000a\000l\000l\000\040\000L\000a\000y\000e\000r}{}% 3
\BOOKMARK [1][]{section.4}{\376\377\000E\000n\000e\000r\000g\000y\000\040\000T\000r\000a\000d\000e\000-\000O\000f\000f\000\040\000i\000n\000\040\000B\000i\000l\000a\000y\000e\000r\000\040\000H\000a\000l\000l\000\040\000S\000y\000s\000t\000e\000m\040\024\000C\000o\000n\000t\000r\000i\000b\000u\000t\000i\000o\000n\000s\000\040\000t\000o\000\040\000E\000q\000u\000a\000t\000i\000o\000n\000\040\000\050\0001\0001\000\051\000\040\000[\000M\000a\000i\000n\000\040\000T\000e\000x\000t\000]}{}% 4
\BOOKMARK [1][]{section.5}{\376\377\000M\000e\000t\000r\000o\000p\000o\000l\000i\000s\000\040\000M\000o\000n\000t\000e\000\040\000C\000a\000r\000l\000o\000\040\000A\000s\000s\000e\000s\000s\000m\000e\000n\000t\000\040\000o\000f\000\040\000t\000h\000e\000\040\000E\000n\000e\000r\000g\000y\000\040\000G\000a\000i\000n\000\040\000D\000u\000e\000\040\000t\000o\000\040\000I\000Q\000H\000E\000\040\000C\000o\000r\000r\000e\000l\000a\000t\000i\000o\000n\000s}{}% 5
\BOOKMARK [1][]{section.6}{\376\377\000T\000w\000o\000-\000C\000o\000m\000p\000o\000n\000e\000n\000t\000\040\000B\000o\000g\000o\000l\000u\000b\000o\000v\000\040\000M\000o\000d\000e\000l\000\040\000f\000o\000r\000\040\000S\000u\000p\000e\000r\000f\000l\000u\000i\000d\000\040\000E\000x\000c\000i\000t\000o\000n\000\040\000B\000E\000C\000\040\000i\000n\000\040\000B\000i\000l\000a\000y\000e\000r\000\040\000H\000a\000l\000l\000\040\000S\000y\000s\000t\000e\000m\000s}{}% 6
\BOOKMARK [1][]{equation.6.23}{\376\377\000R\000e\000f\000e\000r\000e\000n\000c\000e\000s}{}% 7
