# Supplementary material for: Homotopy Phases of FQHE with Long-Range Quantum Entanglement in Monolayer and Bilayer Hall Systems
Source: Nanomaterials (Basel). 2020 Jun 30;10(7):1286. doi: 10.3390/nano10071286 (PMC7408279; doi:10.3390/nano10071286)
Supplement: Supplementary file 1 [file nanomaterials-10-01286-s001.zip › nanomaterials-814391-SM-nobib.tex]

% LaTeX support: latex@mdpi.com 
% In case you need support, please attach all files that are necessary for compiling as well as the log file, and specify the details of your LaTeX setup (which operating system and LaTeX version / tools you are using).

%=================================================================
\documentclass[nanomaterials,supfile,accept,oneauthor,pdftex,10pt,a4paper]{Definitions/mdpi} 

% If you would like to post an early version of this manuscript as a preprint, you may use preprint as the journal and change 'submit' to 'accept'. The document class line would be, e.g., \documentclass[preprints,article,accept,moreauthors,pdftex]{mdpi}. This is especially recommended for submission to arXiv, where line numbers should be removed before posting. For preprints.org, the editorial staff will make this change immediately prior to posting.

%--------------------
% Class Options:
%--------------------
%----------
% journal
%----------
% Choose between the following MDPI journals:
% acoustics, actuators, addictions, admsci, aerospace, agriculture, agriengineering, agronomy, ai, algorithms, allergies, animals, antibiotics, antibodies, antioxidants, applmech, applnano, applsci, arts, asc, asi, atmosphere, atoms, automation, axioms, batteries, bdcc, behavsci , beverages, bioengineering, biology, biomedicines, biomimetics, biomolecules, biosensors, bloods, brainsci, breath, buildings, cancers, carbon , catalysts, cells, ceramics, challenges, chemengineering, chemistry, chemosensors, children, civileng, cleantechnol, climate, clockssleep, cmd, coatings, colloids, computation, computers, condensedmatter, cosmetics, cryptography, crystals, dairy, data, dentistry, designs , diagnostics, diseases, diversity, drones, econometrics, economies, education, ejbc, ejihpe, electricity, electrochem, electronicmat, electronics, endocrines, energies, entropy, environments, epidemiologia, epigenomes, est, fermentation, fibers, fire, fishes, fluids, foods, forecasting, forests, fractalfract, fuels, futureinternet, futurephys, galaxies, games, gardens, gastrointestdisord, gels, genealogy, genes, geohazards, geosciences, geriatrics, hazardousmatters, healthcare, hearts, heritage, highthroughput, horticulturae, humanities, hydrology, ijerph, ijfs, ijgi, ijms, ijtpp, informatics, information, infrastructures, inorganics, insects, instruments, inventions, iot, j, jcdd, jce, jcm, jcp, jcs, jdb, jfb, jfmk, jimaging, jintelligence, jlpea, jmmp, jmse, jne, jnt, jof, joitmc, journalmedia, jpm, jrfm, jsan, land, languages, laws, life, literature, logistics, lubricants, machines, magnetochemistry, make, marinedrugs, materials, mathematics, mca, medicina, medicines, medsci, membranes, metabolites, metals, microarrays, micromachines, microorganisms, minerals, modelling, molbank, molecules, mps, mti, nanomaterials, ncrna, ijns, neurosci, neuroglia, nitrogen, notspecified, nutrients, obesities, oceans, ohbm, osteology, optics, organics, particles, pathogens, pharmaceuticals, pharmaceutics, pharmacy, philosophies, photonics, physics, plants, plasma, pollutants, polymers, polysaccharides, preprints , proceedings, processes, prosthesis, proteomes, psych, psychiatryint, publications, quantumrep, quaternary, qubs, reactions, recycling, religions, remotesensing, reprodmed, reports, resources, risks, robotics, safety, sci, scipharm, sensors, separations, sexes, signals, sinusitis, skins, smartcities, sna, societies, socsci, soilsystems, sports, standards, stats, surfaces, surgeries, suschem, sustainability, world, symmetry, systems, technologies, telecom, test, tourismhosp, toxics, toxins, transplantology, tropicalmed, universe, urbansci, vaccines, vehicles, vetsci, vibration, viruses, vision, water, wem, wevj

%---------
% article
%---------
% The default type of manuscript is "article", but can be replaced by: 
% abstract, addendum, article, benchmark, book, bookreview, briefreport, casereport, changes, comment, commentary, communication, conceptpaper, conferenceproceedings, correction, conferencereport, expressionofconcern, extendedabstract, meetingreport, creative, datadescriptor, discussion, editorial, essay, erratum, hypothesis, interestingimages, letter, meetingreport, newbookreceived, obituary, opinion, projectreport, reply, retraction, review, perspective, protocol, shortnote, supfile, technicalnote, viewpoint
% supfile = supplementary materials

%----------
% submit
%----------
% The class option "submit" will be changed to "accept" by the Editorial Office when the paper is accepted. This will only make changes to the frontpage (e.g., the logo of the journal will get visible), the headings, and the copyright information. Also, line numbering will be removed. Journal info and pagination for accepted papers will also be assigned by the Editorial Office.

%------------------
% moreauthors
%------------------
% If there is only one author the class option oneauthor should be used. Otherwise use the class option moreauthors.

%---------
% pdftex
%---------
% The option pdftex is for use with pdfLaTeX. If eps figures are used, remove the option pdftex and use LaTeX and dvi2pdf.
\newcommand{\bbm}{\mathbf}
\newcommand{\bmb}{\mathbf}
\newcommand{\ket}[1]{\left|#1\right\rangle}
\newcommand{\bra}[1]{\left\langle#1\right|}
\newcommand{\braket}[2]{\left\langle#1\middle|#2\right\rangle}
%=================================================================
\firstpage{1} 
\makeatletter 
\setcounter{page}{\@firstpage} 
\makeatother
\pubvolume{xx}
\issuenum{1}
\articlenumber{5}
\pubyear{2020}
\copyrightyear{2020}
%\externaleditor{Academic Editor: name}
\history{Received: 9 May 2020 ; Accepted: 19 June 2020; Published: date}
\updates{yes} % If there is an update available, un-comment this line

%% MDPI internal command: uncomment if new journal that already uses continuous page numbers 
%\continuouspages{yes}

%------------------------------------------------------------------
% The following line should be uncommented if the LaTeX file is uploaded to arXiv.org
%\pdfoutput=1

%=================================================================
% Add packages and commands here. The following packages are loaded in our class file: fontenc, inputenc, calc, indentfirst, fancyhdr, graphicx,epstopdf, lastpage, ifthen, lineno, float, amsmath, setspace, enumitem, mathpazo, booktabs, titlesec, etoolbox, tabto, xcolor, soul, multirow, microtype, tikz, totcount, amsthm, hyphenat, natbib, hyperref, footmisc, url, geometry, newfloat, caption

\graphicspath{{Definitions/}}
\usepackage{graphicx}
\usepackage{color}

\usepackage{array} \newcommand{\PreserveBackslash}[1]{\let\temp=\\#1\let\\=\temp}
\newcolumntype{C}[1]{>{\PreserveBackslash\centering}m{#1}}
\newcolumntype{R}[1]{>{\PreserveBackslash\raggedleft}m{#1}}
\newcolumntype{L}[1]{>{\PreserveBackslash\raggedright}m{#1}}

%=================================================================
%% Please use the following mathematics environments: Theorem, Lemma, Corollary, Proposition, Characterization, Property, Problem, Example, ExamplesandDefinitions, Hypothesis, Remark, Definition, Notation, Assumption
%% For proofs, please use the proof environment (the amsthm package is loaded by the MDPI class).

%=================================================================
% Full title of the paper (Capitalized)
\Title{Homotopy Phases of FQHE with Long-Range Quantum Entanglement in Monolayer and Bilayer Hall Systems}

%Attention AE/ME. The following layout issues have not been checked by the English Editing Department and must be carefully verified by the AE/Layout Department: All callout issues, bold usage of callouts, and references to callouts in the text. Correct callout usage in figures. Figure and Table layout issues. Footnote formatting and Glossaries have not been checked. En dash usage for negative values, en dash usage to indicate relationships, en dash usage to indicate bonds (especially in chemistry). The English Editing Department is not responsible for correct italic usage for genes, proteins and technical terminology. This responsibility belongs to the authors. The following are also not checked: spacing between numbers and units of measurement, ratios, en dashes for ranges, date and time formats, punctuation in equation lines, and less than/more than spacing (< >). Finally, capitalization and layout of titles/headings must be properly checked as well as ensuring 'Eq.' and 'Fig.' are properly spelled out, as these are layout issues.

% Author Orchid ID: enter ID or remove command
\newcommand{\orcidauthorA}{0000-0002-6946-2495} % Add \orcidA{} behind the author's name
%\newcommand{\orcidauthorB}{0000-0000-000-000X} % Add \orcidB{} behind the author's name

% Authors, for the paper (add full first names)
\Author{Janusz Edward Jacak\orcidA{}}

% Authors, for metadata in PDF
\AuthorNames{Janusz Edward Jacak}

% Affiliations / Addresses (Add [1] after \address if there is only one affiliation.)
\address[1]{%
Department of Quantum Technologies, Faculty of Fundamental Problems of Technology, Wroc{\l}aw University of Science and Technology, Wyb. Wyspia\'nskiego 27, 50-370 Wroc{\l}aw, Poland; janusz.jacak@pwr.edu.pl\\
}

% Contact information of the corresponding author
\corres{Correspondence: janusz.jacak@pwr.edu.pl}
%; Tel.: (optional; include country code; if there are multiple corresponding authors, add author initials) +xx-xxxx-xxx-xxxx (F.L.)}

% Current address and/or shared authorship
%\firstnote{Current address: Affiliation 3} 
%\secondnote{These authors contributed equally to this work.}
% The commands \thirdnote{} till \eighthnote{} are available for further notes

%\simplesumm{} % Simple summary

%\conference{} % An extended version of a conference paper

% Abstract (Do not insert blank lines, i.e. \\) 
%\abstract{Correlated phases in Hall systems have topological character. Multilayer configurations of planar electron systems create the opportunity to change topological phases on demand using macroscopic factors, such as vertical voltage. We present an analysis of such phenomena in close relation to recent experiments with multilayer Hall setups including GaAs and graphene multi-layers. The~consequences of the blocking or not of the inter-layer electron tunneling in stacked Hall configurations are analyzed and presented in detail. Multilayer Hall systems are thus tunable topological composite nanomaterials, in the case of graphene-stacked systems by both intra- and inter-layer voltage.}

% Keywords
%\keyword{correlated Hall homotopy phases; long-range quantum entanglement; bilayer Hall systems; indirect excitons; superfluidity of excitons; reentrant IQHE; FQHE hierarchy in Hall systems; control over homotopy phases}
	
	


% The fields PACS, MSC, and JEL may be left empty or commented out if not applicable
%\PACS{J0101}
%\MSC{}
%\JEL{}

%%%%%%%%%%%%%%%%%%%%%%%%%%%%%%%%%%%%%%%%%%
% Only for the journal Diversity
%\LSID{\url{http://}}

%%%%%%%%%%%%%%%%%%%%%%%%%%%%%%%%%%%%%%%%%%
% Only for the journal Applied Sciences:
%\featuredapplication{Authors are encouraged to provide a concise description of the specific application or a potential application of the work. This section is not mandatory.}
%%%%%%%%%%%%%%%%%%%%%%%%%%%%%%%%%%%%%%%%%%

%%%%%%%%%%%%%%%%%%%%%%%%%%%%%%%%%%%%%%%%%%
% Only for the journal Data:
%\dataset{DOI number or link to the deposited data set in cases where the data set is published or set to be published separately. If the data set is submitted and will be published as a supplement to this paper in the journal Data, this field will be filled by the editors of the journal. In this case, please make sure to submit the data set as a supplement when entering your manuscript into our manuscript editorial system.}

%\datasetlicense{license under which the data set is made available (CC0, CC-BY, CC-BY-SA, CC-BY-NC, etc.)}

%%%%%%%%%%%%%%%%%%%%%%%%%%%%%%%%%%%%%%%%%%
% Only for the journal Toxins
%\keycontribution{The breakthroughs or highlights of the manuscript. The authors can write one or two sentences to describe the most important part of the paper.}


\renewcommand\thesection{\Alph{section}}

%\setcounter{secnumdepth}{4}
%%%%%%%%%%%%%%%%%%%%%%%%%%%%%%%%%%%%%%%%%%
\begin{document}
%%%%%%%%%%%%%%%%%%%%%%%%%%%%%%%%%%%%%%%%%%

%%%%%%%%%%%%%%%%%%%%%%%%%%%%%%%%%%%%%%%%%%

\section{The Magnetic Field Flux Quantum in Multiply Connected~Space}
\label{fluxi}

The magnetic field flux quantum, $\Phi$, defines in 2D the size of a cyclotron orbit, $\frac{\Phi}{B}$. In~2D cyclotron orbits in perpendicular magnetic field are planar without the driving part along the field direction. 
Here we will demonstrate  that the magnetic field flux quantum, $\Phi$, has a different  value in different homotopy phases. 
To this end  one can consider the Bohr-Sommerfeld (BS) rule. This rule links the area of the 1D phase space inside the   classical phase trajectory  loop with the total number of quantum states corresponding to this loop. Let us write out  quasi-classical wave function in a 1D well $U(x)$  with the turning points $a$ and $b$,
\begin{equation}
\Psi(x)=\left\{ \begin{array}{l}\frac{c}{\sqrt{p}} sin \frac{1}{\hbar}\int_a^xpdx,\;\; \textnormal{for} \;\Psi(a)=0,\\ 
\frac{c'}{\sqrt{p}} sin \frac{1}{\hbar}\int_b^xpdx,\;\; \textnormal{for} \;\Psi(b)=0,\\
\end{array}\right.
\end{equation}
where $p(x)=\sqrt{2m(E-U(x))}$ (to simplicity the notation, let us assume the vertical infinite  borders of the well). From~the uniqueness condition  for the wave function one gets,
\begin{equation}
2 \int_a^bpdx=  \oint p dx=  S_{xp}= n 2\pi \hbar =n h,
\end{equation}
which is  the conventional formulation of  BS  rule ($h$ is Planck constant, $n$ is an integer; for the general non-vertical borders of the well $U(x)$, $S_{xp}=(n+\frac{1}{2})h$ \cite{landauqm}). The~BS formula was derived with the condition that the trajectory is of single-loop type. However, for a distinct homotopy class with  multi-loop trajectories one obtains,
\begin{equation} 
2  \int_a^bpdx= \oint pdx= S_{px}= (2k+1) n 2\pi \hbar =n (2k+1) h,
\end{equation}
for additional $k$ loops in trajectories linking points $a$ and $b$. These additional loops on both 
 both phase trajectory branches, 'upper' ($+p$) and 'lower' ($-p$), together creating the closed trajectory after the  integral  $\oint pdx$ add $2\pi k$. 

The above observation  is of high significance  if   BS rule is applied to  an effective 1D phase space ($Y,P_y$) of $x,y$ components of the 2D kinematic momentum at the presence of a perpendicular magnetic field. The~kinematic momentum components can be written explicitly at the Landau gauge, \mbox{$\textbf{A}=(0,Bx,0)$} in the following form,
\begin{equation}
\begin{array}{l}
P_x=-i\hbar\frac{\partial}{\partial x},\\
P_y=-i\hbar \frac{\partial}{\partial y} -eBx.\\ 
\end{array} 
\end{equation}  
The above operators do not commute,
\begin{equation}
[P_x,P_y]_-= i\hbar eB.
\end{equation} 
The  operators, $Y=\frac{1}{eB}P_x$ and $P_y$, can be thus treated as operators of canonically conjugated generalized position $Y$ and momentum  $P_y$,  as~   $[Y,P_y]_- = i\hbar$. Hence,  the~1D effective  phase space, $(Y,P_y)$,  is actually the 2D space, $(P_x,P_y)$. The~2D kinematic  momentum space is, on~the other hand, the~appropriately  renormalized by the factor $\frac{1}{(eB)^2}$ and turned in-plane by $\pi/2$ the ordinary 2D  space $(x,y)$. This is  due to  the quasi-classical formula for the Lorentz force, $\mathbf{F}=\frac{d\mathbf{P}}{dt}=e\frac{d\mathbf{r}}{dt}\times \mathbf{B}$, which gives $dP_{x}=eB dy$ and $dP_y=-eBdx$ determining the relation between the trajectories in the kinematic momentum space and position~space. 

Now we can notice that in  the 2D position space,  trajectories $(x,y)$ may in general belong to  various homotopy classes with some non-contractible additional loops (as in the case of the charged particle 2D systems  at sufficiently strong quantizing magnetic field). In~such nontrivial trajectory homotopy case, from~ the  BS rule one obtains,
\begin{equation} 
S_{YP_y}= n (2k+1) h,
\end{equation}
or rewritten to  $(x,y)$  space,
\begin{equation} 
\label{poles}
S_{x,y}=\frac{(2k+1)n h}{eB},
\end{equation}
which defines  the quantum of the magnetic field flux,
\begin{equation}
\label{flux}
\Phi_k=\Delta S_{x,y} B=\frac{(2k+1)h}{e}, 
\end{equation}
$\Delta S_{x,y}$ is the change of $S_{x,y}$ in Equation~(\ref{poles}) when $n$ is changed by 1.
We see that exclusively  for $k=0$, i.e.,~for the homotopy class without any additional loops on trajectories, the~flux quantum  equals to $\Phi_0=\frac{h}{e}$. This is the fundamental flux quantum. In~other homotopy classes the flux quantum is $(2k+1)$-times~greater. 

Different magnetic field  flux quanta $\Phi_k$ determine different  sizes of the multi-loop cyclotron  orbits, $\Phi_k/B$. We have already shown that the   IQHE corresponds to $k=0$ (the homotopy class of single-loop cyclotron orbits) with the  ordinary single-loop cyclotron orbit of size   $\Delta S_{xy}= \frac{h}{eB_0}= \frac{S}{N}=\frac{S}{N_0}$.  

The FQHE-main hierarchy line corresponds to $k=1,2,\dots$ (the homotopy  classes with \mbox{$q=(2k+1)$-loop} cyclotron orbits or braids, the~halves of cyclotron orbits, with~$k$ additional loops). For~example  for $k=1$ (the simplest and most pronounced Laughlin state), the~three-loop cyclotron orbit is of  the size $\Delta S_{xy}= \frac{3h}{eB}$. This orbit for $B=3B_0$ perfectly  fits to interparticle separation $\frac{S}{N}$ and  via the commensurability condition, $ \frac{3h}{eB}=\frac{S}{N}$, one gets, $\nu=\frac{N}{N_0}=\frac{N}{BSe/h}=\frac{1}{3}$.

Let us emphasize that the quasi-classical method of BS quantization used in many particle systems  is interaction independent, i.e.,~it is accurate   for arbitrarily strong interacting multiparticle systems. Thus, the sizes of the magnetic flux quanta are also interaction independent.  Nevertheless, the~existence of some specific homotopy  trajectories in $(x,y)$ space is conditioned by the Coulomb interaction of 2D charged particles. The~interaction determines the Wigner crystal and the particle separation unavoidably required to the commensurability condition. In~the hypothetical gas system of noninteracting charged particles their mutual positions can be arbitrary, which dismisses the commensurability notion and nontrivial homotopies.  
\label{10}

The Laughlin correlations expressed by exponential, $q=2k+1$, in~the Jastrow polynomial manifesting themselves by the  phase shift $q\pi$ when particle interchange~\cite{laughlin2}, is the 1DUR of the cyclotron braid group generator with additional $k$ loops~\cite{jac-ws}. Actually, for~the initial 1DUR for ordinary electrons, $\sigma_i\rightarrow e^{i\pi}$, we obtain the projective 1DUR for the cyclotron subgroup at $q=2k+1$, $\sigma_i^{q}\rightarrow  e^{iq\pi}$, which  agrees with the Laughlin phase shift $q\pi$.   


\section{The Degeneracy of Landau~Levels}
\label{degeneracja}
The degeneracy of LLs is the property which is independent of material and interaction and results from the form of ladder operators of  kinematic momentum  of a 2D charge particle (electron)  exposed to a perpendicular magnetic field---it is the single-particle effect. At~Landau gauge, $\mathbf{A}=[0,Bx,0]$, $\mathbf{B}=\nabla\times\mathbf{A}=[0,0,B]$, the~kinetic energy of an electron,
\begin{equation}
H=-\frac{\hbar^2}{2m}\frac{\partial^2}{\partial x^2}+\frac{(-i\hbar \frac{\partial}{\partial y}-eBx)^2}{2m},
\end{equation}
and the wave function,
\begin{equation}
\Psi=e^{ip_yy/\hbar}f(x),
\end{equation}
result in  the equation for $f(x)$,
\begin{equation}
\label{oscylator}
-\frac{\hbar^2}{2m} \frac{d^2f(x)}{dx^2}+\frac{e^2B^2}{2m}\left(x-\frac{p_y}{eB}\right)^2f(x)=Ef(x).
\end{equation}
Equation~(\ref{oscylator}) is the oscillator equation with energy spectrum, $E_n=(n+\frac{1}{2})\hbar \omega_B$, where  $\omega_B=\frac{eB}{m}$,  with~the  degeneracy due to a shift of the oscillator center, $x_0=\frac{p_y}{eB}$. This oscillator  center  must be located inside the sample $L_x\times L_y$, i.e.,~$0< x_0< L_x$, whereas $p_y=\frac{2 \pi \hbar n_y}{L_y}$. 
The condition for $x_0$ gives,
\begin{equation}
0< p_y < eBL_x,
\end{equation}
thus the total number of states for a whole range of $p_y$ equals to $\frac{L_xL_yBe}{h}$, which is the degeneracy of LLs,~$N_0$.   

A filling rate  of LLs is expressed by the ratio $\nu=\frac{N}{N_0}$. In~the case of Chern topological insulators without LLs, a~filling rate is counted per crystalline node, i.e.,~$\nu=\frac{N}{n_0}$, where $n_0$ is number of nodes in the~lattice.


\section{Reentrant IQHE in a Single Hall~Layer}
\label{reentrant} 
The problem of so-called reentrant IQHE experimentally observed in a single layer of a conventional 2DES or graphene manifests itself as quantization $R_{xy}=\frac{h}{e^2\nu}$ with $\nu=1,3,\dots$, and~$R_{xx}=0$ but for an actual filling $\nu_{nom}$ deviated from integer $\nu$. This deviation is quite large, and the reentrant behavior is observed in GaAs samples even up to $\nu_{nom}\in (0.8, 1.2)$. It is easy to explain this effect as the result of the energy competition enforcing a local redistribution of electrons in such a way that electrons are concentrated in stripes with local filling rate exactly equal to $\nu_{local}=1$ (or other integers for higher LLs). The~integer local filling in stripes allows for formation of IQHE correlations ranged to stripes despite the fractional nominal filling. This is possible because the energy gain due to IQHE state formation in stripes prevails the increase of the Coulomb interaction energy due to striping when electrons attain local density beyond or below the actual charge density of the jellium. 
The simple simulation of the related energy trade-off is as follows ($\Delta E$ per the area $l_B^2$, in~units of $\frac{1}{4\pi \epsilon_0}\frac{e^2}{l_B}$),
\begin{equation}
\label{deltae}
\begin{array}{l}
\Delta E= - \frac{l-x}{l(2\pi)^2} \int_0^ldx_1 \int_x^l dx_2\int_0^Ldy_1\int_0^Ldy_2 \frac{1}{\epsilon_1 \sqrt{(x_1-x_2)^2 +(y_1-y_2)^2}}\\
+\left(\frac{l-x}{l2\pi}\right)^2 \int_0^ldx_1 \int_0^l dx_2\int_0^Ldy_1\int_0^Ldy_2 \frac{1}{\epsilon_1 \sqrt{(x_1-x_2)^2 +(y_1-y_2)^2}}\\
+0.85 \times 0.5\left( \frac{l}{2\pi}\right)^2\int_x^ldx_1 \int_x^l dx_2\int_0^Ldy_1\int_0^Ldy_2 \frac{1}{\epsilon_1 \sqrt{(x_1-x_2)^2 +(y_1-y_2)^2}}\\
-0.92 \times 0.5 \left(\frac{l-x}{ 2l\pi}\right)^2 \int_0^ldx_1 \int_0^l dx_2\int_0^Ldy_1\int_0^Ldy_2 \frac{1}{\epsilon_1 \sqrt{(x_1-x_2)^2 +(y_1-y_2)^2}},\\
\end{array}
\end{equation}
where integrations account for the Coulomb energy of attraction between electrons either located in the stripe $(l-x)\times L$ with $\nu_{local}=1$ or on the entire plaquette with $\nu_{nom}=\frac{l-x}{l}$ and the jellium of size $l\times L$ positively charged with the density per $l_B^2$,  $\rho= \frac{l-x}{l2\pi}$ (size dimensions are expressed in units of $l_B$, the~energy in units of $\frac{1}{4 \pi \varepsilon_0}\frac{e^2}{l_B}$). The~interaction between electrons in the stripe with $\nu_{local}=1$ is assessed according to Metropolis Monte Carlo simulation~\cite{montecarlo} of IQHE ({cf. Supplementary Materials \ref{monte}). This procedure results in the coefficient $0.85$ reducing electron interaction in Laughlin-type state with the Jastrow polynomial with $q=1$ (IQH state). The~electrons compressed in the stripe $(l-x)\times L$ are not balanced by the local jellium with lower charge density $\frac{l-x}{l}\frac{1}{2\pi}$ corresponding to the nominal filling rate $\nu_{nom}=\frac{l-x}{l}$. The~energy gain due to incompressible IQHE state in the stripe prevails; however, the~electrostatic energy increase is caused by imbalanced charge distribution. 
The plot for $\Delta E$ assessed by the Monte Carlo simulation is presented in Figure~\ref{f4} (for $l=L=100 (500) l_B$ and $\varepsilon_1= 12.9(2)$ for GaAs and graphene, respectively). One can notice that reentrant IQHE is energetically convenient for $x<x^*$ ($\Delta E(x^*)=0$), which gives (for considered in the model $l=L=100 (500) l_B$) $\nu_{nom}>0.82$ (for graphene with four times lower permittivity in free space~\cite{egraph} the reentrant deviation in energy is larger, but~the onset of reentrant IQHE is similar for GaAs $\nu_{nom}>0.8$. We thus conclude that the constant 0.92 in Equation~(\ref{deltae}) properly models the uncorrelated state contribution for the IQHE reentrance, and~this factor is next used in Equations~(6) and (7).  


\begin{figure}[H]
	\centering
	\scalebox{0.2}{\includegraphics{wg1000}}
	\caption{(\textbf{Upper}) The pictorial illustration of the shift of electron distribution resulting in reentrant IQHE. (\textbf{Lower}) Evaluation of $\Delta E$ according to Equation~(\ref{deltae}) versus $x$, $\nu_{nominal}=\frac{l-x}{l}$ (for $x=20 l_B$ and $l=100 l_B$, $\nu_{nominal}=0.8$ as is visible in experiment~\cite{pan2003}). } 
	\label{f4}
\end{figure}


To assess the energy of electron-electron interaction it has been used the Metropolis Monte Carlo simulation method~\cite{montecarlo} (cf. Supplementary Materials \ref{monte}), which allows for calculation of the e-e interaction energy averaged over the correlated quantum multiparticle state given by the Laughlin function  or (as needed in our case) by the Slater function for completely filled the lowest LL (for $\nu=1$), $\left<\Psi(z_1,\dots, z_N)\left|\sum_{i>j}^N\frac{1}{|z_i-z_j|}\right|\Psi(z_1,\dots,z_N)\right>$ 
(here $z_l=x_l+iy_l$ are complex representations of particle positions $\textbf{r}_l=(x_l,y_l)$, $l=1,\dots,N$). This energy per single-particle scales with $N$ as proportional to $ \sqrt{N} $, cf. Figure~\ref{f66}. Similarly scales the energy of Coulomb interaction jellium-jellium, which can be accounted for analytically (in cylindrical geometry),
$\frac{\rho^2}{2}\int_S d^2r_1\int_S d^2r_2\frac{1}{|\textbf{r}_1-\textbf{r}_2|}=
\frac{8\sqrt{\nu}\sqrt{N}}{3\pi \sqrt{2}}$. The~energy of interaction of electrons with jellium averaged over the correlated Hall state, $$\left<\Psi(z_1,\dots,z_N)\left|-\rho
\sum_{i=1}^N\int_Sd^2r\frac{1}{|\textbf{r}-\textbf{r}_i|}
\right|\Psi(z_1,\dots,z_N)\right>/N,$$ 
can be also assessed by the Metropolis Monte Carlo approach for quantum averaging, using  the analytical form of the integral, $\rho\int_Sd^2r\frac{1}{|\textbf{r}-\textbf{r}_i|}=
\sqrt{2\nu}\sqrt{N}f\left(\frac{|\textbf{r}_i|}{R}\right)$, with~$f(x)=\left\{\begin{array}{l}
\frac{2E(x)}{\pi},\;x\leq~1\\
\left(\frac{1}{2x}\right) F_{2;1}(1/2,1/2:2:1/x^2),\;x\geq~1\\
\end{array}\right.$, where $E(x)$ is the complete elliptic integral and $F_{2;1}(a,b:c:y)$ is the hypergeometric function ($R$ is the radius of the sample
plaquette in cylindrical geometry). The~scaling of the averaged energy of electron-jellium interaction as proportional to $\sqrt{N}$ is~explicit. 


\section{Energy Trade-Off in Bilayer Hall System---Contributions to Equation~(11) [Main~Text]}

\label{energytradeoff}


The terms $\Delta E_{top(bot)}$ in  Equation~(11) [Main Text]  represent the energy gain caused by the striping internally in each layer, top and bottom, respectively. The~term $\Delta E_{inter}$ represents the contribution to the energy gain due to the inter-layer interaction. They have the following form,
\begin{equation}
\label{energy1}
\begin{array}{lll}
\Delta E_{top}&=&el_{top}\left[\nu_{local}=1\right] \leftrightarrow jell_{top}\left[\rho=\frac{l-x}{l 2\pi}\right]\\
&-&el_{top}\left[\nu_{nom}=\frac{l-x}{l}\right] \leftrightarrow jell_{top} \left[\rho=\frac{l-x}{l2\pi}\right]\\
&+&el_{top}\left[\nu_{local}=1\right] \leftrightarrow el_{top}\left[\nu_{local}=1\right]\\
&-&el_{top}\left[\nu_{nom}=\frac{l-x}{l}\right] \leftrightarrow el_{top}\left[\nu_{nom}=\frac{l-x}{l}\right]\\
\end{array}
\end{equation}
and
\begin{equation}
\label{energy2}
\begin{array}{lll}
\Delta E_{bot}&=&el_{bot}\left[\nu_{local}=1\right] \leftrightarrow jell_{bot}\left[\rho=\frac{x}{l 2\pi}\right]\\
&-&el_{bot}\left[\nu_{nom}=\frac{x}{l}\right] \leftrightarrow jell_{bot}
\left[\rho=\frac{x}{l 2\pi}\right]\\
&+&el_{bot}\left[\nu_{local}=1\right] \leftrightarrow el_{bot}\left[\nu_{local}=1\right]\\
&-&el_{bot}\left[\nu_{nom}=\frac{x}{l}\right] \leftrightarrow el_{bot}\left[\nu_{nom}=\frac{x}{l}\right].\\
\end{array}
\end{equation}
In the above expressions, we used the following notation: $\leftrightarrow $ marks the Coulomb interaction between electrons ({\it el}) or jellium ({\it jell}) in a single layer ({\it top} or {\it bottom}) in the stripes with the indicated local filling factors adjusted to  the presence or absence of the striped structure. 
The last term in Equation~(11) [Main Text] describes the energy gain due to the inter-layer interaction across the barrier in the stripe structure. It has the form,
\begin{equation}
\label{energy3}
\begin{array}{lll}
\Delta E_{inter}&=&el_{top}\left[\nu_{local}=1\right] \leftrightarrow jell_{bot}\left[\rho=\frac{x}{l 2\pi}\right]\\
&-&el_{top}\left[\nu_{nom}=\frac{l-x}{l}\right] \leftrightarrow jell_{bot}\left[\rho=\frac{x}{l 2\pi}\right]\\
&+&el_{bot}\left[\nu_{local}=1\right] \leftrightarrow 
jell_{top}\left[\rho=\frac{l-x}{l 2\pi}\right]\\
&-&el_{bot}\left[\nu_{nom}=\frac{x}{l}\right] \leftrightarrow jell_{top}\left[\rho=\frac{l-x}{l 2\pi}\right]\\
&+&el_{top}\left[\nu_{local}=1\right] \leftrightarrow el_{bot}\left[\nu_{local}=1\right]\\
&-&el_{top}\left[\nu_{nom}=\frac{l-x}{l}\right] \leftrightarrow el_{bot}\left[\nu_{nom}=\frac{x}{l}\right].\\
\end{array} 
\end{equation}
The  expressions (\ref{energy1}), (\ref{energy2}) and (\ref{energy3}) have the following explicit forms, respectively,
\begin{equation}
\label{ggg}
\begin{array}{lll}
\Delta E_{top}= 
&-&\frac{l-x}{l(2\pi)^2} \int_{x}^{l}dx_1\int_{0}^L dy_1\int_0^{l} dx_2 \int_0^L dy_2 {\cal{A}}(1,2)\\
&+&\left(\frac{l-x}{l2\pi}\right)^2 \int_{0}^{l}dx_1\int_{0}^L dy_1\int_0^{l} dx_2 \int_0^L dy_2{\cal{A}}(1,2)
\\ 
&+&0.85\times 0.5 \left(\frac{1}{2\pi}\right)^2\int_x^ldx_1\int_0^Ldy_1\int_x^ldx_2\int_0^Ldy_2 {\cal{A}}(1,2)\\
&-&0.92 \times 0.5 \left(\frac{l-x}{l2\pi}\right)^2\int_0^ldx_1\int_0^Ldy_1\int_0^ldx_2\int_0^Ldy_2 {\cal{A}}(1,2),
\\
\end{array} 
\end{equation}
\begin{equation}
\label{ggg1}
\begin{array}{lll} 
\Delta E_{bot}=&-&\frac{x}{l(2\pi)^2} \int_{0}^{x}dx_1\int_{0}^L dy_1\int_0^{l} dx_2 \int_0^L dy_2{\cal{A}}(1,2)\\
&+&\left(\frac{x}{l2\pi}\right)^2 \int_{0}^{l}dx_1\int_{0}^L dy_1\int_0^{l} dx_2 \int_0^L dy_2{\cal{A}}(1,2)
\\
&+&0.85 \times 0.5 \left(\frac{1}{2\pi}\right)^2\int_0^xdx_1\int_0^Ldy_1\int_0^xdx_2\int_0^Ldy_2{\cal{A}}(1,2)\\
&-&0.92\times 0.5 \left(\frac{x}{l 2\pi}\right)^2\int_0^ldx_1\int_0^Ldy_1\int_0^ldx_2\int_0^Ldy_2 {\cal{A}}(1,2)
,\\
\end{array}
\end{equation}
\begin{equation}
\label{ggg2}
\begin{array}{lll}
\Delta E_{inter}=&- &\frac{x}{l(2\pi)^2}\int_x^ldx_1\int_0^Ldy_1\int_0^ldx_2\int_0^Ldy_2{\cal{B}}(1,2)\\
&+& \frac{x(l-x)}{(l2\pi)^2}\int_0^ldx_1\int_0^Ldy_1\int_0^ldx_2\int_0^Ldy_2{\cal{B}}(1,2)\\
&-& \frac{l-x}{l(2\pi)^2}\int_0^xdx_1\int_0^Ldy_1\int_0^ldx_2\int_0^Ldy_2{\cal{B}}(1,2)\\
&+& \frac{x(l-x)}{(l2\pi)^2}\int_0^ldx_1\int_0^Ldy_1\int_0^ldx_2\int_0^Ldy_2{\cal{B}}(1,2)	\\
&+&\frac{1}{(2\pi)^2}\int_x^ldx_1\int_0^Ldy_1\int_0^xdx_2\int_0^Ldy_2{\cal{B}}(1,2)\\
&-&\frac{x(l-x)}{(l2\pi)^2}\int_0^ldx_1\int_0^ldy_1\int_0^ldx_2\int_0^ldy_2{\cal{B}}(1,2),
\\
\end{array}
\end{equation}
in the above,  ${\cal{A}}(1,2)=\frac{1}{\varepsilon_1 \sqrt{(x_1-x_2)^2 +(y_1-y_2)^2}}$,
${\cal{B}}(1,2)=\frac{1}{\varepsilon_2 \sqrt{d^2+(x_1-x_2)^2 +(y_1-y_2)^2}}$, $\varepsilon_{1(2)}$ denotes the dielectric permittivity of the layer (barrier) material.  All dimensions are taken in $l_B$ units.


In Equation~(11) [Main Text], $\Delta E$ means the energy gain of the striped structure with local  $\nu_{local}=1$ in the filled stripes with respect to the non-striped uniform two layers with the nominal $\nu_{bot}=\frac{x}{l}$ and $\nu_{top}=\frac{l-x}{l}$  ($\nu_{bot}+\nu_{top}=1$)  for an arbitrary $x\in(0,l)$. One can notice that the condition $\nu_T=1$ (or other integer) is connected with the geometrically unique situation when two stripes in the top layer (the first one of width $x$ and empty of electrons (positively charged due to jellium) while the subsequent one of $l-x$ width  overfilled with electrons up to local $\nu_{local}=1$) ideally fit to the inverted stripe ordering in the bottom layer, as~shown in Figure~\ref{gow111}. The~negatively charged stripes are over-charged with electrons (beyond the positive jellium charge still corresponding to the nominal filling rate $\nu_{top}=\frac{l-x}{l}$ and $\nu_{bot}=\frac{x}{l}$) up to local $\nu_{local}=1$ (with the density of electrons $\frac{1}{2\pi}$ per $l_B^2$ surface, and~the jellium charge density $\frac{\nu_{nominal}}{2\pi}$). 

\begin{figure}[H]
\centering
\scalebox{0.22}{\includegraphics{wg600.eps}}
\caption{The cartoon presentation of the bilayer Hall structure GaAs/GaAlAs/GaAs with marked dimension of an elementary striped sector of length $l$. Electrons are shifted  to the  over-charged stripes, while empty stripes are hole stripes charged by the positive jellium. The~structure is mirrored symmetrical with charge change across the barrier of thickness $d$, which is possible only for a complementary filling of layers, $\nu_{top}+\nu_{bot}=1$ (r other integer), with~$\nu_{top}=\frac{(l-x)}{l}$ and $\nu_{bot}=\frac{x}{l}$ (in left panel, both equal to 1/2).  } 
\label{gow111} %%is this `(left)' extra? If so, please remove.
\end{figure}


Two last multi-fold integrals in Equations~(\ref{ggg}) and (\ref{ggg1})  describe the quantum effects beyond the electrostatic interaction of stripes and are crucial for the total energy trade-off and the resulting phase diagrams. The~factors  $0.85$, $0.92$ in these integrals correspond to the energy gain due to electron-electron interaction in the correlated IQH  state ($0.85$) for the $\nu_{local}=1$  with respect to not correlated state at $\nu_{nominal}<1$ (the latter entering with the factor  $0.92$). The~factors, 0.85 and 0.92, are most important for the energy minimization and are determined by the Monte Carlo Metropolis method~\cite{montecarlo} used  to the estimation of the energy of correlated integer quantum Hall state with respect to the uncorrelated state and adjusted (0.92) to the experimental data for the observed  range of a monolayer reentrant IQHE state ($\nu_{reentrant}^{IQH}\in(0.8,1.2)$). The~factors for the IQH state in the overfilled stripes (0.85) is assessed by the numeric Monte Carlo Metropolis method~\cite{montecarlo} for the multiparticle Slater-type wave function for IQHE~\cite{laughlin2}. 


\section{Metropolis Monte Carlo Assessment of the Energy Gain Due to IQHE~Correlations}
\label{monte}
The method has been developed~\cite{montecarlo} to assess multidimensional of high order integrals for particle interaction energy in states described by the Laughlin function. Instead of taking the multidimensional integral directly, a~quickly convergent iteration random procedure is applied to define the particle distribution governed by the density of probability given by the multiparticle wave function under analysis. The~repeating small finite and random steps for position changes of all particles are undertaken up to  determination of a maximal value of the wave function modulus at final positions. The~iteration of this procedure repeated ca. $10^8$ times  defines the distribution of particle positions in agreement with the multiparticle wave function, in~this case, with~the Laughlin functions for FQHE states (including the IQHE state for  $\nu=1$, when the Jastrow polynomial has the Vandermonde determinant form). The~resulted distribution of particle positions is independent of a start points of the iteration and reveals interparticle correlations specific to a particular quantum Hall state. The~determination of different but equivalent distributions of particle positions is repeated next ca. $10^6$ times densely covering local maxima of the examined multiparticle wave function. Each distribution allows for estimation of the corresponding electron-electron and electron-jellium interactions in accordance with the multiparticle wave function. Next, these particular results for the interaction energies are averaged over all $10^6$ repetitions of particle distribution determination  which finally gives the quantumly averaged the electron-electron and electron-jellium interaction energies  with  high accuracy confirmed by the perfect consistence with the exact diagonalization on small models and with the experimentally measured activation energies for states at various filling rates. The~method is efficient and relatively quick and not limited to small $N$ only (contrary to the exact diagonalization of the interaction feasible only in very small model Hall systems). Therefore, this method is especially convenient and sufficiently accurate to study an effect of the reentrant IQHE  in twin Hall structures, where inclusion of relatively high number of electrons is~necessary. 


\begin{figure}[H]
	\centering
	\scalebox{1}{\includegraphics{fig-SI-13.eps}}
	\caption{The components of the interaction energy per single particle for the correlated state of IQHE, $\nu=1$ as listed in Table~\ref{t1}, versus $\sqrt{N}$ (by Metropolis Monte Carlo method of averaging over quantum states given by the multiparticle Laughlin-type wave function with $q=1$ for $\nu=1$). } 
	\label{f66}
\end{figure} 
\unskip 


\begin{table}[H]
	\centering
		\caption{Energies of various Coulomb channels for $\nu=1$ IQH state calculated by Metropolis Monte Carlo simulation (in units of $\frac{e^2}{l_B}\frac{1}{4\pi \varepsilon_0}$).}
	\begin{footnotesize}
		\begin{tabular}{C{1cm}C{2cm}C{1.5cm}C{1.4cm}C{1.5cm}}
		\toprule
			\boldmath{$N$}&\boldmath{$E_{{jell-jell}}/N$}& \boldmath{$E_{{jell-el}}/N$}& \boldmath{$E_{{el-el}}/N$}& \boldmath{$\Delta E_{{total}}/N $} \\
			\midrule
			80&5.36845&$-$10.6326&4.6936&$-$0.570516\\
			\midrule
			160&7.59213&$-$15.1761&6.95414&$-$0.629868\\
			\midrule
			240&9.29843&$-$18.5908&8.672&$-$0.620415\\
			\midrule
			320&10.7369&$-$21.4734&10.1046&$-$0.631899\\
			\midrule
			400&12.0042&$-$24.0026&11.3821&$-$0.616286\\
			\midrule
			480&13.15&$-$26.2682&12.4993&$-$0.618932\\
			\bottomrule
		\end{tabular}
	\end{footnotesize}
	\label{t1}
\end{table}


In more details, the~Metropolis Monte Carlo method~\cite{montecarlo} consists of an assessment of the quantum mean value,
\begin{equation}
\left<\Psi_m\left(z_1,\dots, z_N\right)\left|A\left(z_1,\dots,z_N\right)\right|\Psi_m\left(z_1,\dots,z_N\right)\right>,
\end{equation}
for $\Psi(z_1,\dots, z_N)
=\prod_{i<j}^N(z_i-z_j)^q e^{\left[-\sum_{i=1}^N|z_i|^2/4l_B^2\right]}$. The~function $A(z_1,\dots, z_N)$ may be averaged over numerous (of $10^6$ order) various distributions of $z_1,\dots, z_N$ satisfying the detailed balance according to the probability density $\left.\left<\Psi\right|\Psi\right>$. Such particular particle position distributions are determined by the random walk for all variables $z_1,\dots,z_N$ starting from the randomly selected initial start points with the positive feedback imposed assuring a growth of the probability density $\left.\left<\Psi\right|\Psi\right>$ along the random walk. This gives the convergence to an optimal distribution of particle positions respecting correlations involved in the Laughlin wave function. The~repetition of this procedure sufficiently many times and the averaging of the quantity $A(z_1,\dots,z_N)$ over all distributions efficiently and quickly approaches searched quantum mean value of $A$. The~procedure is the subject of its optimization by the control of the feedback criteria and the length of steps of the random walk of point positions~\cite{montecarlo}. 

The Metropolis MC procedure may be applied to Hall systems with varying particle number N. Next, the~results for averaged energies can be extrapolated to the thermodynamic limit (due to scaling of all multiparticle averaged energies with respect to $\sqrt{N}$). In~Table~\ref{t1} there are collected a few exemplary energies related to the Hall system with respect to $N$ for the IQHE state, $\nu=1$ (cf. Figure~\ref{f66}). From~these data one can refine the coefficient 0.85 used in Equations~(6) and (7) as well as in Equation~(\ref{deltae}) for representation of the $el-el$ interaction energy in IQHE phase in the integral form, $0.85 \times \frac{1}{2}\left( \frac{l}{2\pi}\right)^2\int_x^ldx_1 \int_x^l dx_2\int_0^Ldy_1\int_0^Ldy_2 \frac{1}{\epsilon_1 \sqrt{(x_1-x_2)^2 +(y_1-y_2)^2}}$, in~the plaquette $(l-x)\times L$ with local filling $\nu_{local}=1$.  


\section{Two-Component Bogolubov Model for Superfluid Exciton BEC in Bilayer Hall~Systems}
\label{twocomponent} 
Creation of the indirect excitons in a twin Hall system is related with the inter-layer Coulomb coupling of the LL band electrons and holes occupying appropriate complementary states in opposite layers numbered by the LL quantum numbers $(k,n=0)$ in the LLL, as~given by Equation~(10) [Main Text] (in the Landau gauge $A=(0,Bx,0)$). 

The striping in $k$-space corresponds to the striping of electron distribution in $x\times y$ space complementary in opposite layers and can be accounted for by the similar electrostatic energy gain  as given in Equation~(11) [Main Text]. Striping in $k$-space may in particular correspond to a longitudinal or transverse orientation of stripes depending on the selected gauge. The~arbitrariness of the gauge choice allows for maintenance of the $k$ striping in the counterflow~configuration.

The two-component, $(\pm)$ and $(\mp)$, BEC of the indirect excitons with suppressed $k$ number (enumerating the LL degeneracy of states given by Equation~(10)) [Main Text] may be described 
in terms of a new quantum number---2D momentum $p$ \cite{dz,bogolub} via the model Hamiltonian,
\begin{equation}
\label{ham1}
\begin{array}{l} 
H=H^a+H^b\\=\sum\limits_pE^a_p a^+_p a_p+ \frac{1}{2S}\sum\limits_{p_1,p_2,p_3,p_4,p_1+p_2=p_3+p_4}u_a
(|p_1-p_4|)a^+_{p_1}a^+_{p_2}a_{p_3}a_{p_4}\\
+\sum\limits_pE^b_p b^+_p b_p+ \frac{1}{2S}\sum\limits_{p_1,p_2,p_3,p_4, p_1+p_2=p_3+p_4}u_b(|p_1-p_4|)b^+_{p_1}b^+_{p_2}b_{p_3}b_{p_4},
\end{array}
\end{equation}
where $a(b)^{(+)}_p$ are the boson--exciton annihilation (creation) operators in $p$ state for $\pm(\mp)$ polarization; $E^{a(b)}_p=\frac{p^2}{2m_{a(b)}^*}$ is the kinetical energy with the effective mass $m_{a(b)}^*$ of the exciton (as derived in~\cite{dz}, the~mass of exciton in Hall system is not connected to band characteristics, and~the current direction with respect to the external electric field is governed by the drift scheme~\cite{dz,ueda,zlz,macd,fertig1989}). In~this way we model the two-component indirect exciton liquid consisting of oppositely polarized electron-hole pairs suppressing their internal structure, though~the momentum $p$ of excitons may be associated, at~selected Landau gauge, with~the pairing of $(k+p/2,1(2),-k+p/2,2(1))$ electron-hole states~\cite{fertig1989,macd,zlz,ueda,dz}. In~the effective Hamiltonian (\ref{ham1}) we neglect the interaction between differently polarized excitons because their spatial separation in $k$ stripes, though~interaction between stripes has been included by appropriate electrostatic terms in Equation~(11) [Main Text]. A~difference in population of oppositely polarized excitons displays an imbalance of filling rates, $\nu_T=\nu_{bot}+\nu_{top}$. The~initial BEC is associated in the model (\ref{ham1}) with the condensate of a macroscopic number $N^{a(b)}_0$ of bosons $a(b)^+_p$ in $p=0$ state ($N^{a(b)}_0 \simeq N^{a(b)}$, at~low temperatures, $N^{a(b)}$---total number of excitons with polarization $\pm(\mp)$ in the system). We henceforth suppress the further analysis to the only one subsystem as the second one is analogous. Because~$a_0^+ a_0\left|0\right>=N^a\left|0\right>$, where $\left|0\right>$ is the ground state ($T=0$), for~large $N^a_0$ one can approximate operators by numbers, $a^+_0=a_0=\sqrt{N^a_0}$, and~then,
\begin{equation} 
\begin{array}{lll}
H^a&\simeq& \frac{1}{2S} u(0) N^{a2}_0 +\sum_p\left[E^a_p+\frac{N^a_0}{S}u_a(|p|)\right]a^+_pa_p\\&+&\frac{N^a_0}{2S}\sum_{p\neq 0}
u_a(|p|)(a^+_pa^+_{-p}+a_p a_{-p}).\\
\end{array}
\end{equation}
After the Bogolubov diagonalization, $ a_p=\alpha(p) {\tilde a}_p +\beta^*(p) {\tilde a}^+_{-p}$, $a^+_p=\alpha^*(p){\tilde a}^+_p+\beta(p){\tilde a}_{-p}$, one finds,
\begin{equation}
H^a\simeq\frac{1}{2S}u_a(0)N^{a2}_0+\Delta E^a +\sum_p\epsilon^a_p {\tilde a}^+_p {\tilde a}_p,
\end{equation}
where $\epsilon^a_p=\sqrt{\frac{p^4}{4m_a^{*2}}+\frac{N^a_0p^2u_a(|p|)}{m_a^*S}}$ $=|p|\sqrt{\frac{p^2}
{4m_a^{*2}}+\frac{N^a_0u_a(|p|)}{m_a^*S}}$ (and analogously for $H^b$ part of the Hamiltonian (\ref{ham1})).
For the long-wave-length limit (small $|p|$), $\epsilon^a_p\simeq c^a |p|$, with~the constant $c^a=\sqrt{\frac{N^a_0 u_a(0)}{m_a^*S}}$ is the phonon-type spectrum provided that $u_a(0)>0$, i.e.,~the original bosons must repulse themselves;
$\Delta E^a=-\frac{1}{2}\sum_{p,p\neq 0}(E^a_k+u_a(|p|)\frac{N^a_0}{S}-\epsilon^a_p)$. Hence, for~the repulsing bosons the low energy excitation spectrum beyond the BEC is of phonon-type, which guarantees the superfluidity of the BEC due to impossibility to simultaneously fulfill a conservation of the energy and momentum for such phonon-type excitations at scatterings~\cite{bogolub}. We see that $c^a\sim\sqrt{ N^a_0 }$ but in the twin Hall configuration with $\nu_T=\nu_{top}+\nu_{bot}=1$ we deal with $N^a_0=\nu_{bot} \frac{S}{2\pi}$, whereas $N^b_0=\nu_{top}\frac{S}{2 \pi}$ and $N^a_0+N^b_0=\frac{S}{2\pi}$ ($S$ is the single layer surface in $l_B^2$ units). In~the balanced case $u_a(0)\simeq u_b(0)$, but~the imbalanced filling, $N^a_0\neq N^b_0$, causes difference in superfluid properties of both components of exciton liquid. The~critical superflow, $j_{a(b)}=\frac{\nu_{bot(top)}}{2\pi}c^{a(b)}$, is lower for smaller filling $\nu_{top(bot)}$ also due to lower $c^{a(b)}\sim \sqrt{N^{a(b)}_0}$. The~drift velocity, perpendicular to the applied electric field $E$, is $\sim \frac{E}{B}$, thus the critical electric field $E_c\simeq Bc^{a(b)}$ and differs for opposite polarizations at the imbalanced filling of the twin~system.

In the model (\ref{ham1}), the~operators $a^+(b^+)_p$ are ideal boson operators, whereas the initial indirect excitons---let us  represent them by operators labeled with $k$,  $a^+(b^+)_k$, are not exact bosons due to their internal structure expressed in $k$ states (Equation (10) [Main Text]), as~$a^+_ka^+_k=0$ ($b^+_kb^+_k=0$). The~applicability of the BEC model is here conditioned by the degeneracy of exciton $k$ states, which results from the LL massive degeneracy. Due to this degeneracy the quasi-boson excitons, $a^+(b^+)_k$, with~the same energy may be modeled by the BEC in the $p=0$ state of true bosons, $a^+(b^+)_p$, experiencing the magnetic field presence only by their internal structure~\cite{zlz,ueda,dz,fertig1989} and weakly repulsing due to $k$ striping, which leads to their superfluidity. Please note that $k$ enumerates states given by Equation~(10) [Main Text] in the main text and marks the internal structure of excitons at an assumed gauge, but~not the energy (neither of electrons and of holes nor of excitons) and, moreover, may be substituted by a distinct quantum number if one changes the gauge of the magnetic field potential. The~momentum $p$ of the exciton is thus irrelevant to $k$ (and to gauge) \cite{dz,zlz,ueda,macd,fertig1989} though the role of the $k$ striping is essential for the exciton BEC~superfluidity.

The striping in $k$-space corresponds to the complementary striping of electron distribution in $x\times y$ space in both layers and can be accounted in the  simulation as was presented in the main text. Striping in $k$-space may correspond to the distinct stripe orientation in $x\times y$ space depending on the selected gauge. The~arbitrariness of the gauge choice allows for $k$ striping maintenance in the counterflow configuration in agreement with the experimental~observations. 


The  defined above model of the two-component BEC of indirect excitons with two opposite polarizations, $(\pm)$ and $(\mp)$, agrees with the theory developed in Refs~\cite{dz,ueda,zlz,fertig1989,macd}, where the low energy spectrum for Landau quantized electron systems in twin layers separated by an insulating barrier has been discussed assuming the ground state in the form of the BEC of indirect excitons. For~limiting situation of a zero thickness of the barrier for excitons (neglecting their instability due to exciton recombination) the parabolic low energy dispersion above the BEC has been derived precluding the BEC superfluidity in a Hall monolayer. However,  for~a phonon-type excitation dispersion, found for a finite thickness of the dielectric barrier~\cite{fertig1989,macd}, the~superfluidity is admitted. The~latter, though~limited to a single $\mp$ polarization of excitons in Refs~\cite{fertig1989,macd}, actually proves the repulsion of the indirect excitons in the considered two-component model (\ref{ham1}).


%%%%%%%%%%%%%%%%%%%%%%%%%%%%%%%%%%%%%%%%%%
\reftitle{References}

% Please provide either the correct journal abbreviation (e.g. according to the “List of Title Word Abbreviations” http://www.issn.org/services/online-services/access-to-the-ltwa/) or the full name of the journal.
% Citations and References in Supplementary files are permitted provided that they also appear in the reference list here. 

%=====================================
% References, variant A: external bibliography
%=====================================

%=====================================
% References, variant B: internal bibliography
%=====================================

\begin{thebibliography}{-------}
\providecommand{\natexlab}[1]{#1}

\bibitem[Landau and Liifsitz(1965)]{landauqm}
Landau, L.; Liifsitz, E.M.
\newblock {\em Quantum mechanics, no-relativistic theory}; Pergamon Press:
  Oxford,  1965.

\bibitem[Laughlin(1983)]{laughlin2}
Laughlin, R.B.
\newblock Anomalous quantum {H}all effect: an incompressible quantum fluid with
  fractionally charged excitations.
\newblock {\em Phys. Rev. Lett.} {\bf 1983}, {\em 50},~1395.

\bibitem[Jacak \em{et~al.}(2012)Jacak, Gonczarek, Jacak, and
  J{\'o}{\'z}wiak]{jac-ws}
Jacak, J.; Gonczarek, R.; Jacak, L.; J{\'o}{\'z}wiak, I.
\newblock {\em Application of Braid Groups in {2D} Hall System Physics:
  Composite Fermion Structure}; World Scientific: Singapore,  2012.

\bibitem[Ciftja and Wexler(2003)]{montecarlo}
Ciftja, O.; Wexler, C.
\newblock Monte {C}arlo simulation method for {L}aughlin-like states in a disk
  geometry.
\newblock {\em Phys. Rev. B} {\bf 2003}, {\em 67},~075304.

\bibitem[Gorkov and Dzyaloshinskii(1968)]{dz}
Gorkov, L.P.; Dzyaloshinskii, I.E.
\newblock Contribution to the theory of the {M}ott exciton in a strong magnetic
  field.
\newblock {\em Sov. Phys. JETP} {\bf 1968}, {\em 26},~449.

\bibitem[Bogolubov(1947)]{bogolub}
Bogolubov, N.N.
\newblock On the theory of supefluidity.
\newblock {\em Journal of Phys.} {\bf 1947}, {\em 11},~23.

\bibitem[Paquet \em{et~al.}(1985)Paquet, Rice, and Ueda]{ueda}
Paquet, D.; Rice, T.M.; Ueda, K.
\newblock Two-dimensional electron-hole fluid in a strong perpendicular
  magnetic field: {E}xciton {B}ose condensate or maximum density
  two-dimensional droplet.
\newblock {\em Phys. Rev. B} {\bf 1985}, {\em 32},~5208.

\bibitem[Kallin and Halperin(1984)]{zlz}
Kallin, C.; Halperin, B.
\newblock Excitations from a filled {L}andau level in the two-dimensional
  electron gas.
\newblock {\em Phys. Rev. B} {\bf 1984}, {\em 30},~5655.

\bibitem[{MacDonald}(2001)]{macd}
{MacDonald}, A.
\newblock Superfuid properties of double-layer quantum {H}all ferromagnets.
\newblock {\em Phys. E} {\bf 2001}, {\em 298},~129.

\bibitem[Fertig(1989)]{fertig1989}
Fertig, H.A.
\newblock Energy spectrum of a layered system in a strong magnetic field.
\newblock {\em Phys. Rev. B} {\bf 1989}, {\em 40},~1087.

\bibitem[Santos and Kaxiras(2013)]{egraph}
Santos, E.; Kaxiras, E.
\newblock Electric-Field Dependence of the Effective Dielectric Constant in
  Graphene.
\newblock {\em Nano Lett.} {\bf 2013}, {\em 13},~898.

\bibitem[Pan \em{et~al.}(2003)Pan, St{\"o}rmer, Tsui, Pfeiffer, Baldwin, and
  West]{pan2003}
Pan, W.; St{\"o}rmer, H.L.; Tsui, D.C.; Pfeiffer, L.N.; Baldwin, K.W.; West,
  K.W.
\newblock Fractional quantum {H}all effect of composite fermions.
\newblock {\em Phys. Rev. Lett.} {\bf 2003}, {\em 90},~016801.

\end{thebibliography}


% The following MDPI journals use author-date citation: Arts, Econometrics, Economies, Genealogy, Humanities, IJFS, JRFM, Laws, Religions, Risks, Social Sciences. For those journals, please follow the formatting guidelines on http://www.mdpi.com/authors/references
% To cite two works by the same author: \citeauthor{ref-journal-1a} (\citeyear{ref-journal-1a}, \citeyear{ref-journal-1b}). This produces: Whittaker (1967, 1975)
% To cite two works by the same author with specific pages: \citeauthor{ref-journal-3a} (\citeyear{ref-journal-3a}, p. 328; \citeyear{ref-journal-3b}, p.475). This produces: Wong (1999, p. 328; 2000, p. 475)


%%%%%%%%%%%%%%%%%%%%%%%%%%%%%%%%%%%%%%%%%%
%% optional

%% for journal Sci
%\reviewreports{\\
%Reviewer 1 comments and authors’ response\\
%Reviewer 2 comments and authors’ response\\
%Reviewer 3 comments and authors’ response
%}

%%%%%%%%%%%%%%%%%%%%%%%%%%%%%%%%%%%%%%%%%%
\end{document}
