# Supplementary figures and images for: Homotopy Phases of FQHE with Long-Range Quantum Entanglement in Monolayer and Bilayer Hall Systems
Source: MDPI journal article supplement (doi:10.3390/nano10071286), 2020-06-30

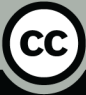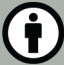

BY

Supplement: s1 [file s1]

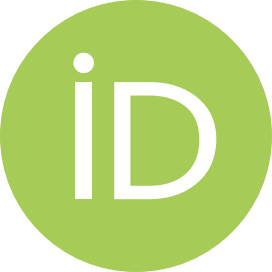

Supplement: s1 [file s1]

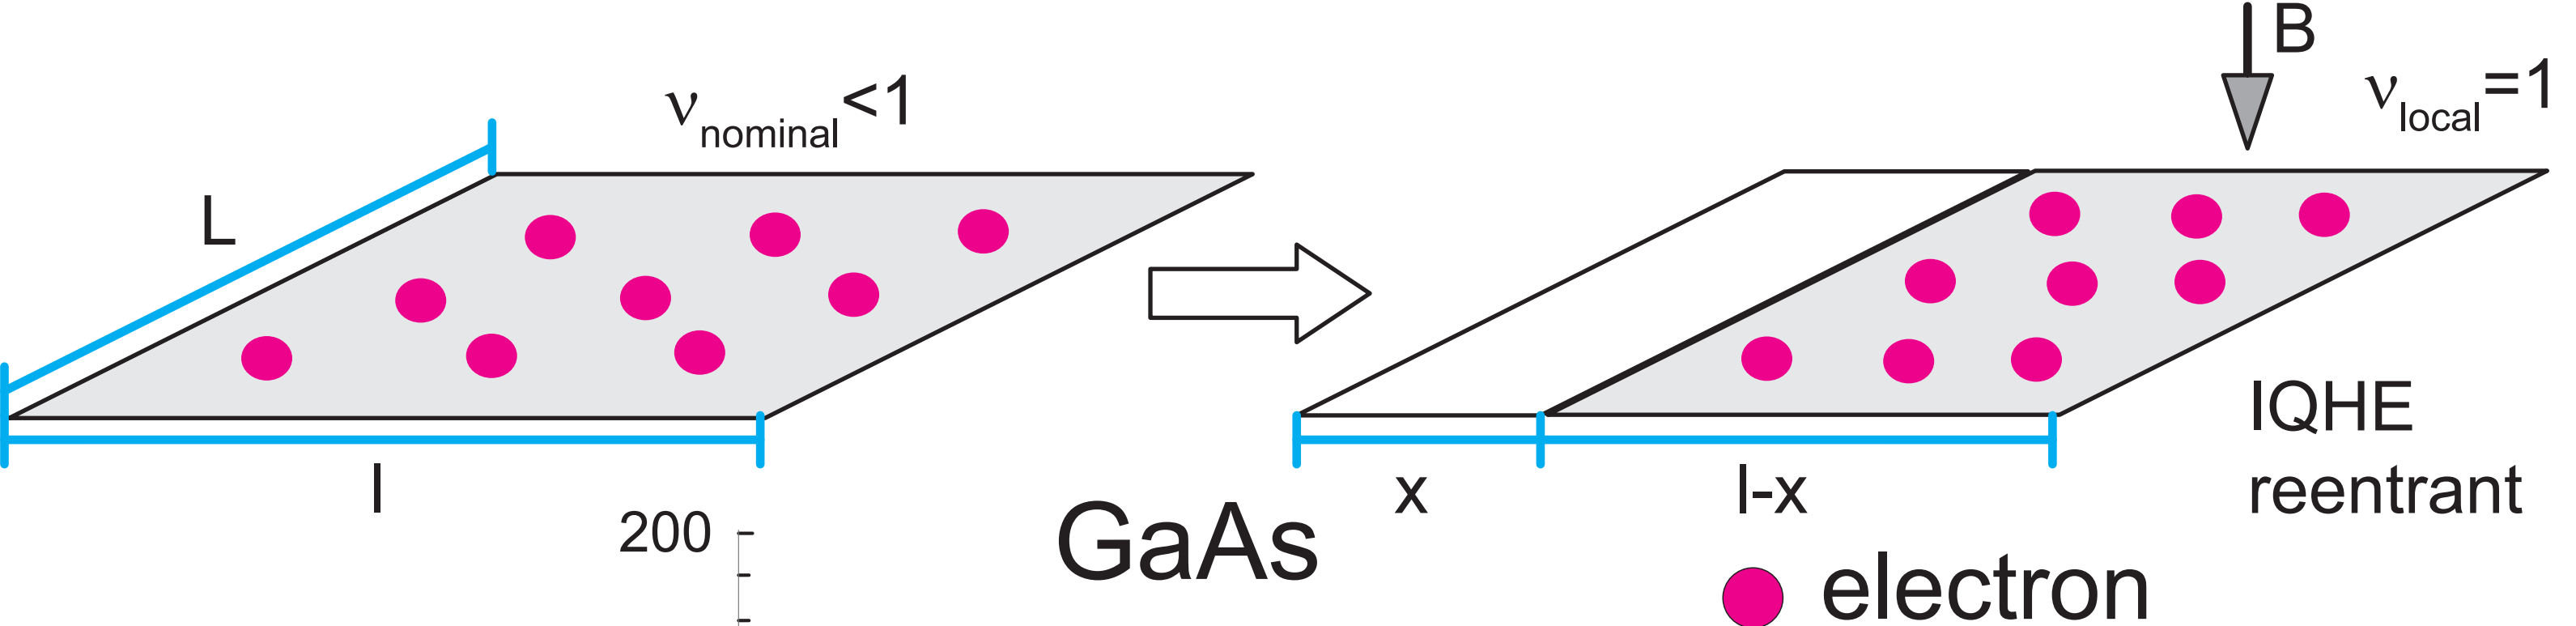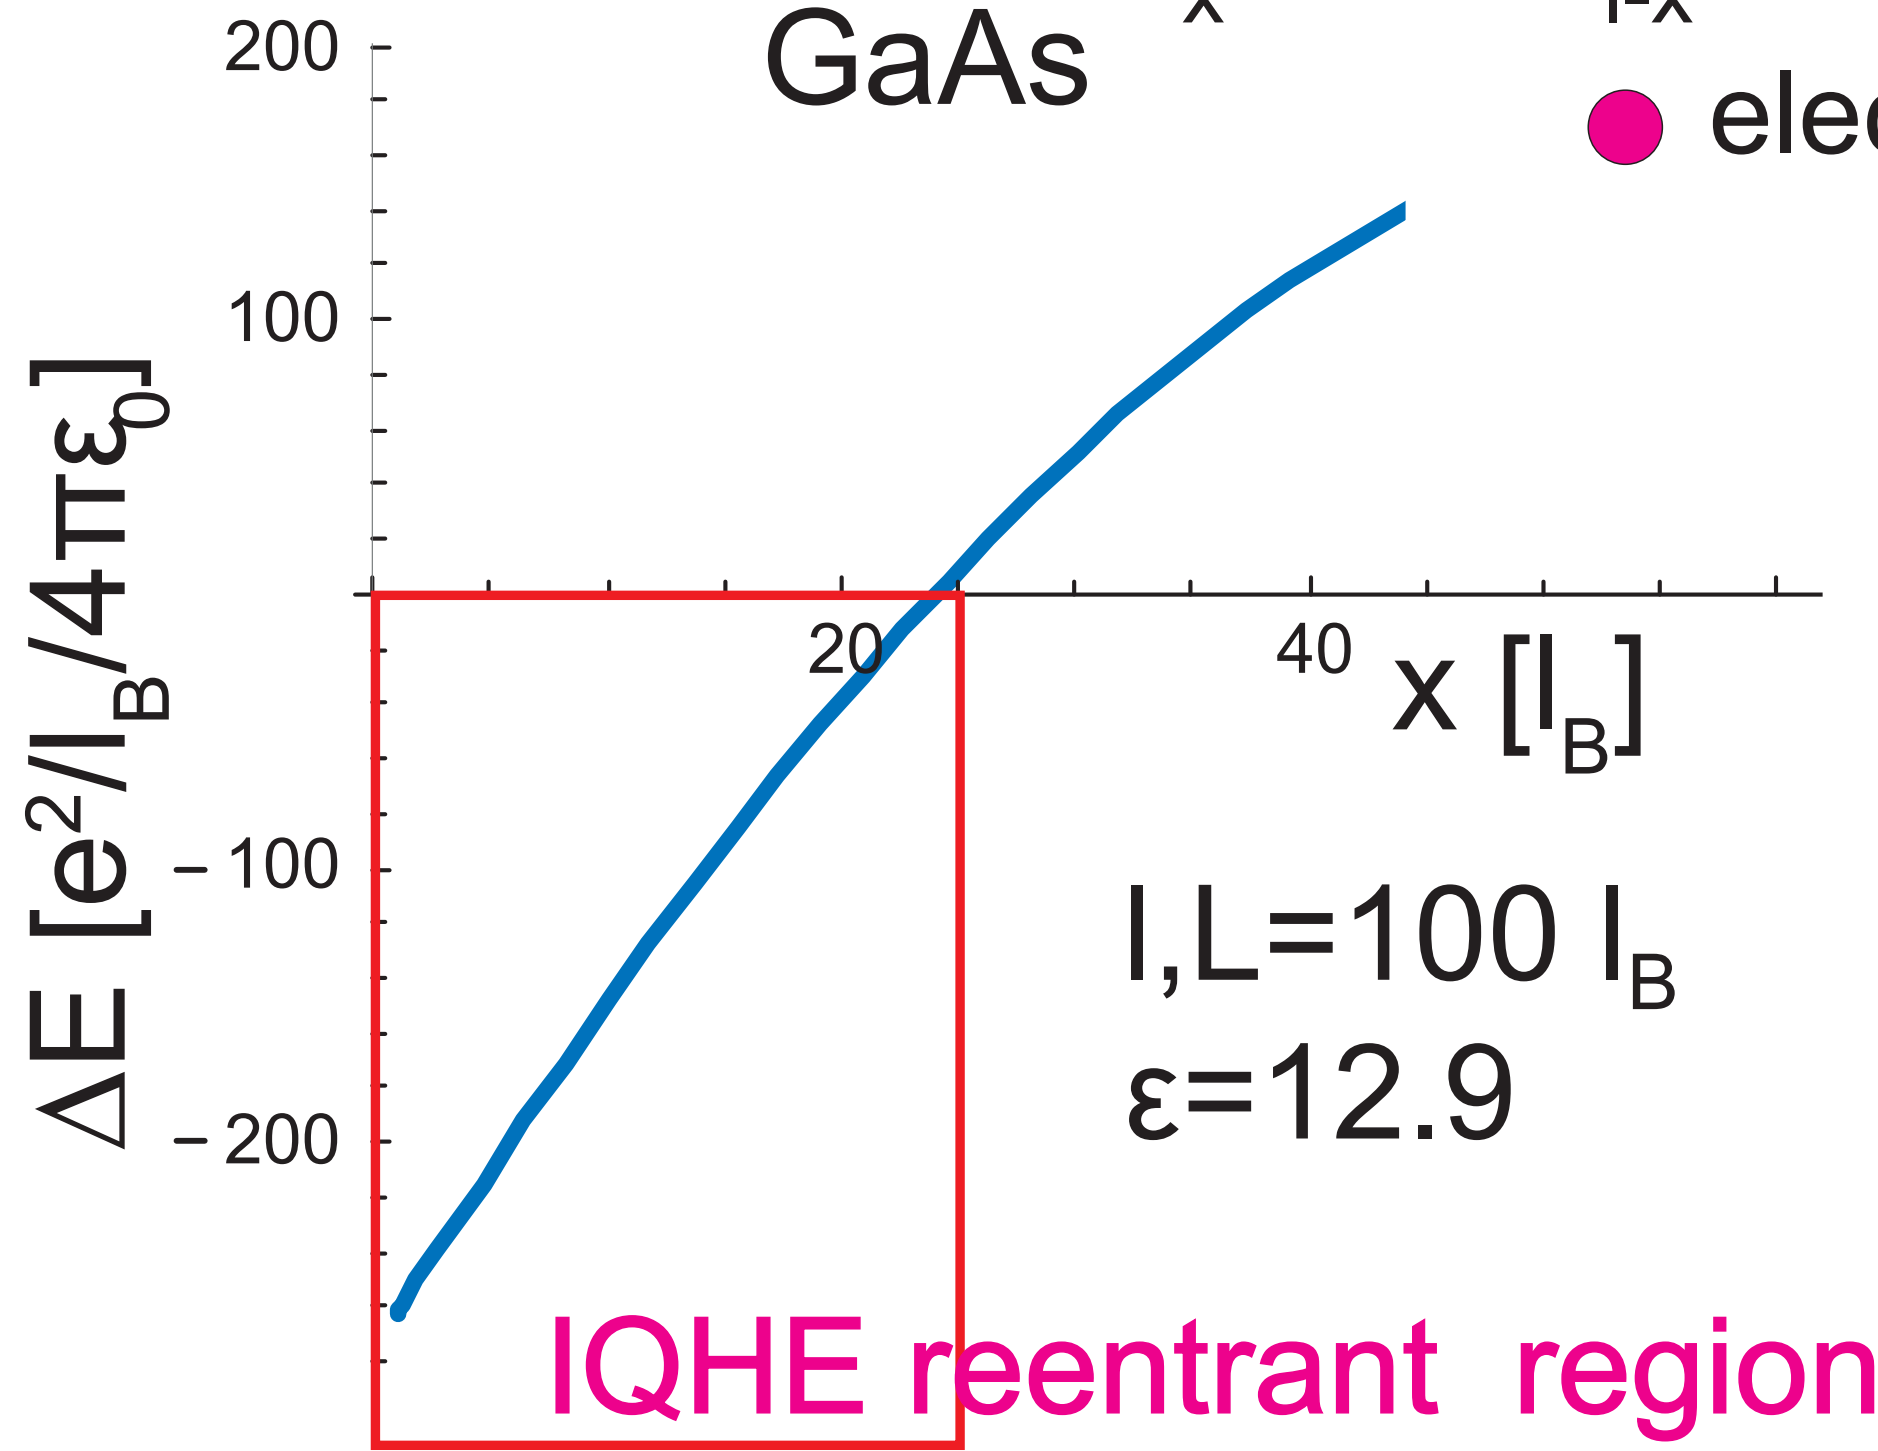

Supplement: s1 [file s1]

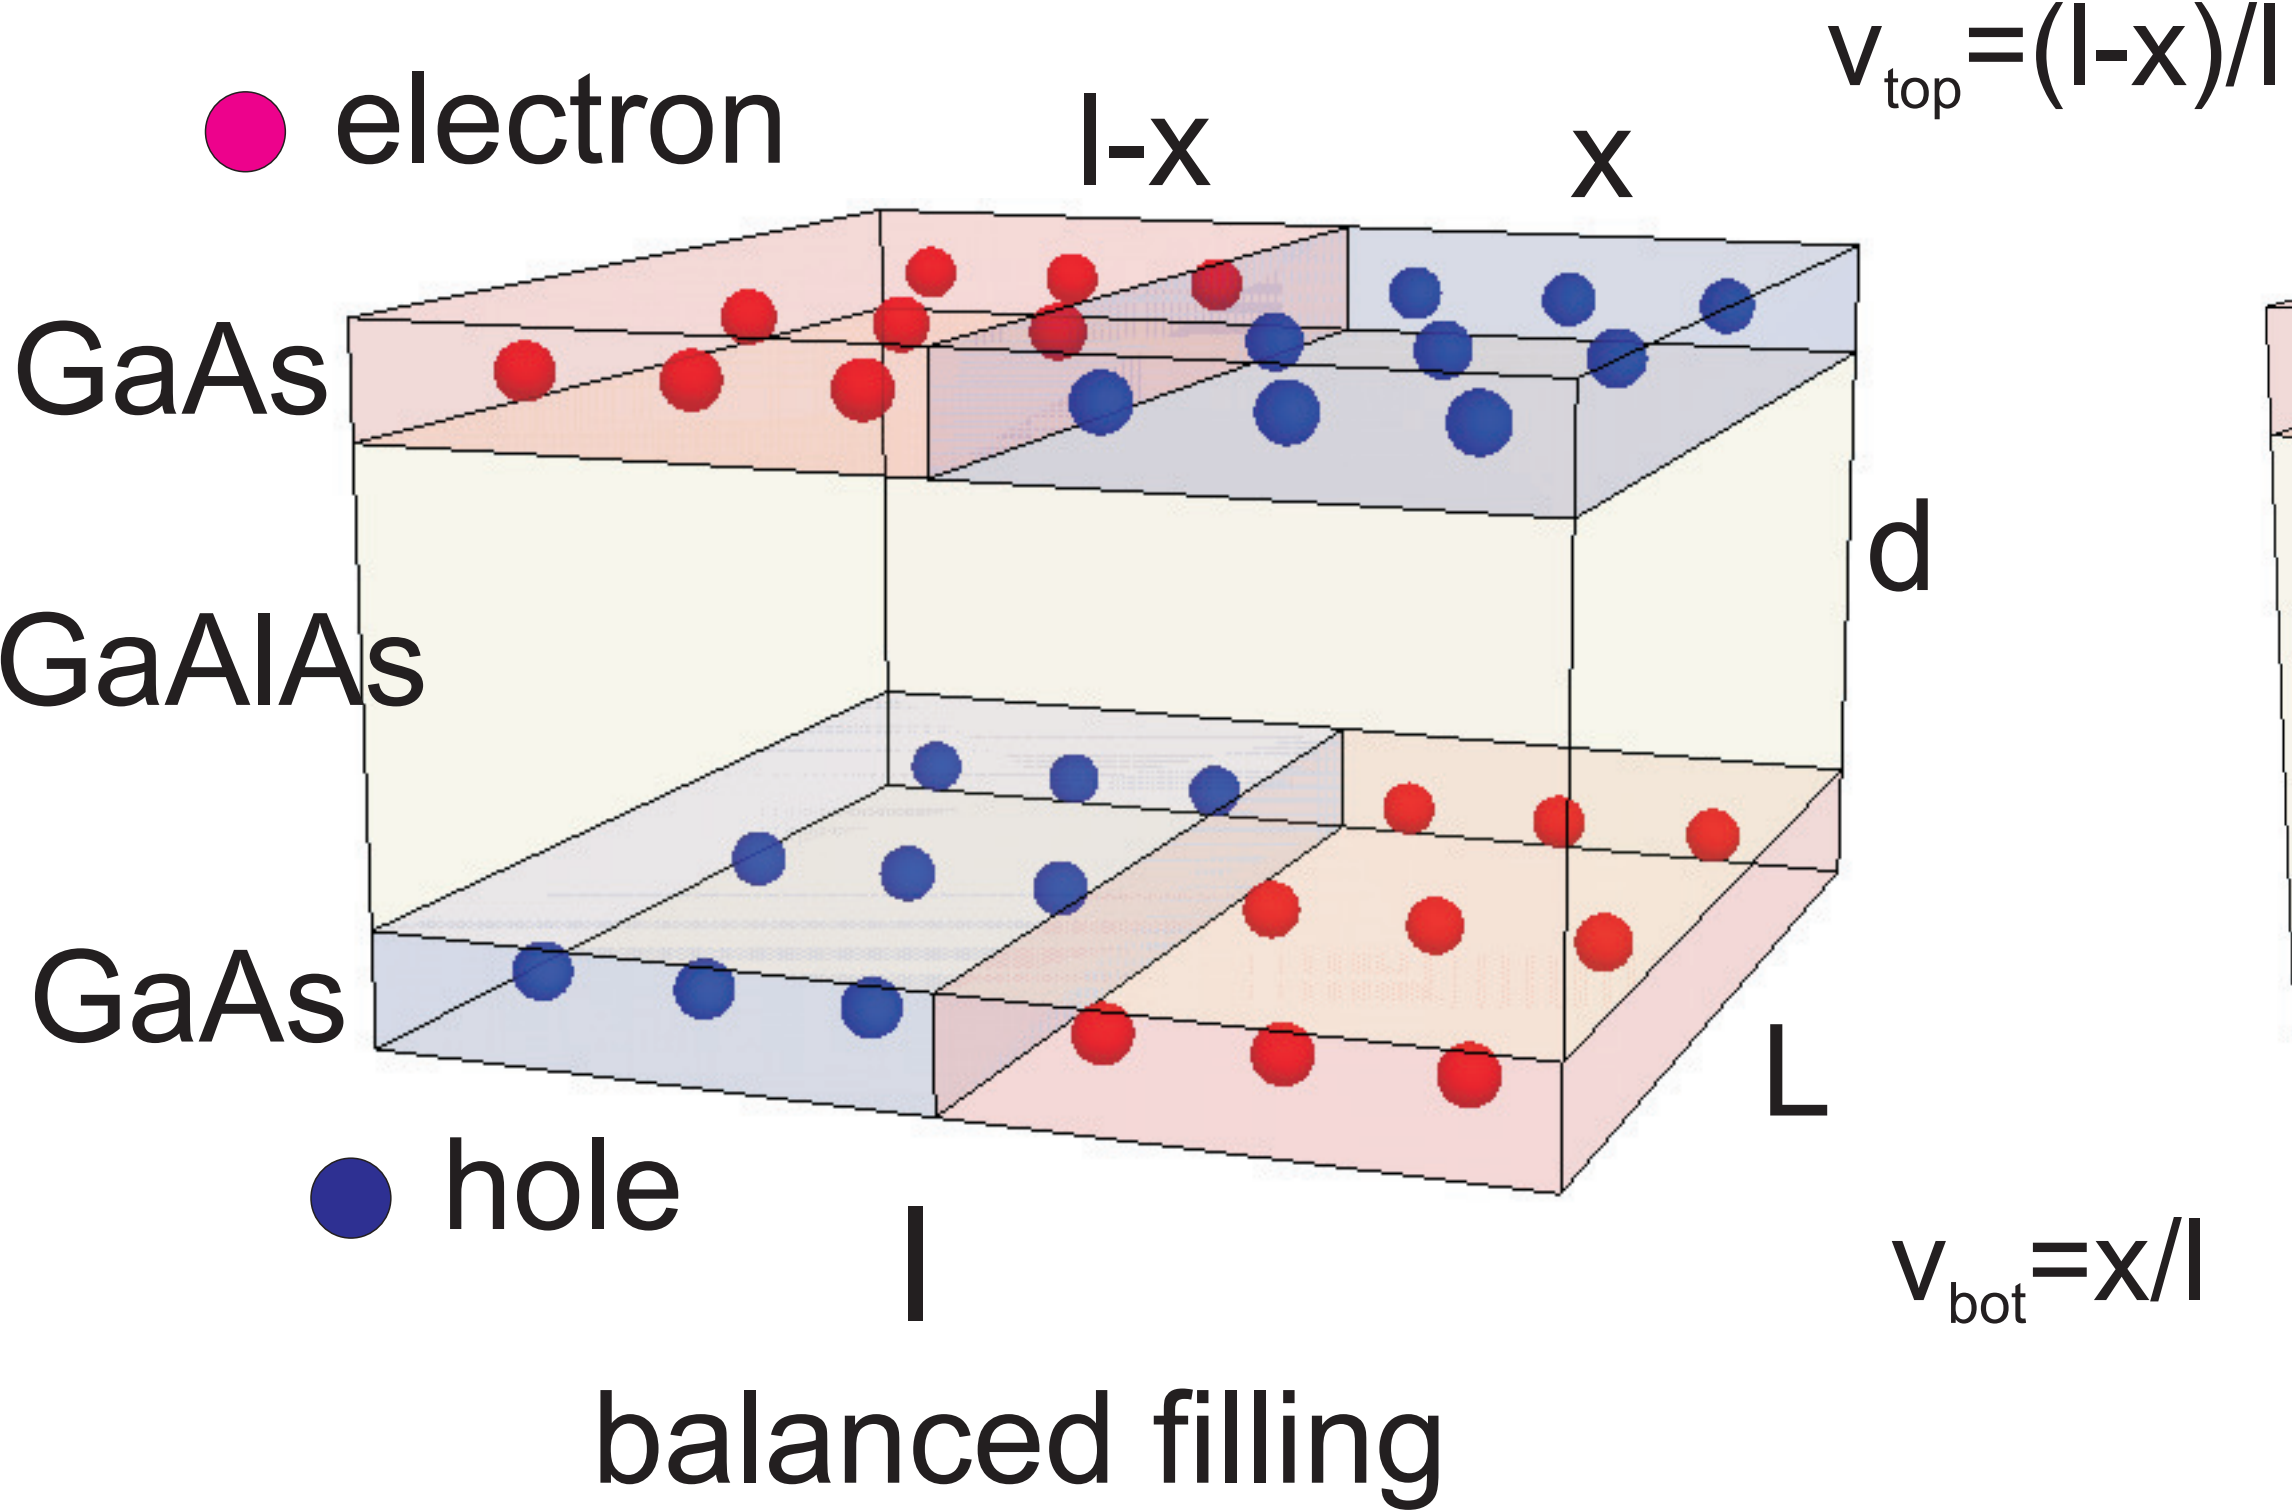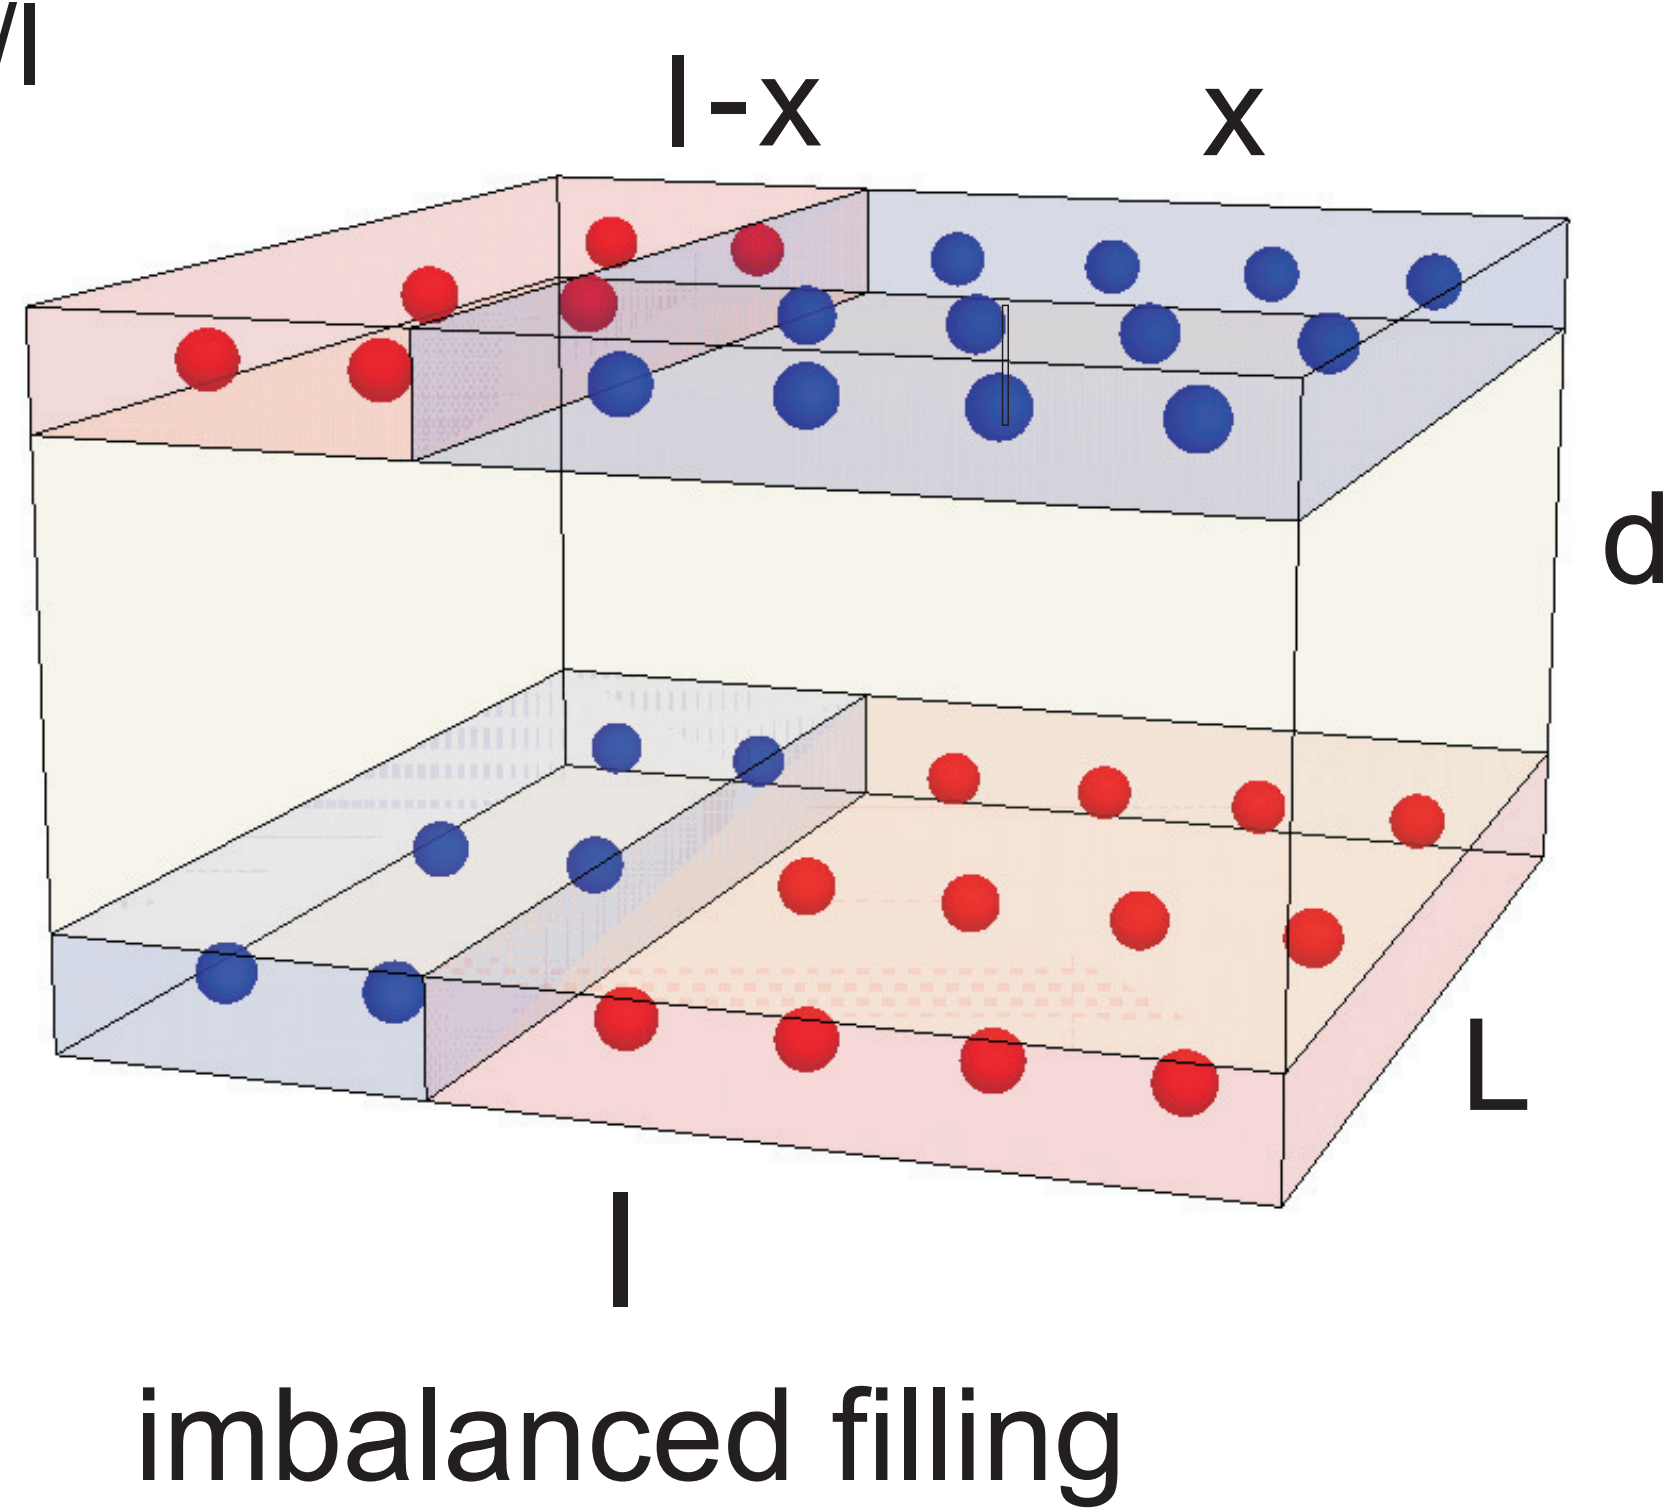

Supplement: s1 [file s1]

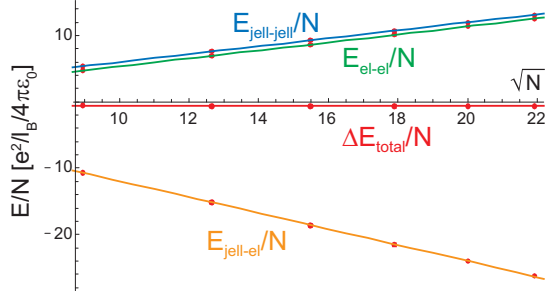

Supplement: s1 [file s1]

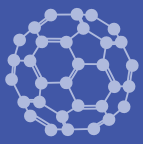

*nanomaterials*

Supplement: s1 [file s1]
